# Supplementary material
Source: PubMed Central journal article supplement (PMC7456226)
Supplement: jci-130-135048-s158.pdf [file jci-130-135048-s158.pdf]

## **Supplemental Materials for**

### **Myeloid Signature Reveals Immune Contexture and Predicts The Prognosis of Hepatocellular Carcinoma**

Chong Wu<sup>†</sup>, Jie Lin<sup>†</sup>, Yulan Weng, Dan-Ni Zeng, Jing Xu, Shufeng Luo, Li Xu, Mingyu Liu, Qiaomin Hua, Chao-Qun Liu, Jin-Qing Li, Jing Liao, Cheng Sun, Jian Zhou, Min-Shan Chen, Chao Liu, Zhenhong Guo, Shi-Mei Zhuang, Jin-hua Huang, and Limin Zheng\*

#### **Supplemental Materials Inventory**

- 1. Supplemental Methods**
- 2. Supplemental Figures** (Supplemental Figures 1–21)
- 3. Supplemental Tables** (Supplemental Tables 1–17 except for Supplemental Table 11 and Supplemental Table 12, which are provided as separate Excel files)
- 4. Supplemental References**

## Supplemental Methods

### *Patient Information*

The primary cohort included 488 patients from the Sun Yat-sen University Cancer Center (SYSUCC) who were randomly divided into a primary training subset ( $n = 244$ ) and a primary test subset ( $n = 244$ ). An independent internal validation cohort (341 patients from the SYSUCC) and an external validation cohort (combined from two separate cohorts, which included 94 and 254 patients from the Taizhou Hospital of Zhejiang Province [THZP] and Fudan University Zhongshan Hospital [FUZH], respectively) were also enrolled. The inclusion criteria used for patient enrollment from the consecutive cohorts were as follows: no anticancer therapies; no diagnosis or history of any other concurrent malignancies; no concurrent autoimmune diseases, HIV or syphilis; and available follow-up data. The exclusion criteria were Child-Pugh C liver function and evidence of hepatic decompensation, which included refractory ascites, esophageal or gastric variceal bleeding, or hepatic encephalopathy. The clinicopathological characteristics of the patients in the four cohorts are summarized in **Supplemental Table 2**.

Curative resection for HCC was performed with the following intraoperative goals: (1) the complete removal of all tumor nodules, (2) a resection margin of at least 1 cm, and (3) a lack of tumor cells on the cut surface based on histological examinations. Intraoperative ultrasound and postsurgical contrast-enhanced computed tomography (CT) were routinely used to verify the complete resection of HCC. Patients were postoperatively followed up with regular surveillance at 2- to 4-month intervals. Serum alpha-fetoprotein (AFP) levels ( $\leq 25$  ng/mL was considered AFP negative), abdominal ultrasonography, and chest radiography were performed for surveillance for recurrence. Further examinations, including CT, hepatic angiography, and biopsies (when necessary), were performed when tumor recurrence or metastasis was suspected. Patients with confirmed recurrence received further treatments, including a second surgical resection, transcatheter arterial chemoembolization, radiofrequency ablation, percutaneous ethanol injection or sorafenib treatment.

A cohort of 51 patients who had recurrent disease after hepatectomy for HCC at SYSUCC between January 2002 and March 2016 were additionally recruited. A daily dose of 800 mg sorafenib was prescribed after the diagnosis of tumor recurrence. Inclusion criteria for this cohort were as follows: (1) histologically confirmed HCC and previous hepatectomy; (2) tissue sections available for IHC staining; (3) recurrent HCC confirmed based on at least two imaging technologies (e.g., hepatic ultrasound together with CT and/or magnetic resonance imaging); (4) complete medical records and precise follow-up data; (5) sorafenib therapy after HCC recurrence; and (6) no second treatment, (e.g., transcatheter arterial chemoembolization, radiofrequency ablation, or percutaneous ethanol injection) before confirmed disease progression. Patients who received sorafenib before recurrence and/or metastasis were excluded from the study. Response to sorafenib treatment was assessed using the Response Evaluation Criteria in Solid Tumors (RECIST; version 1.1). Therapeutic efficacy after confirmed progression and a second treatment was not taken into account as response to sorafenib.

### ***Specimens and Tissue Microarray (TMA) Construction***

Formalin-fixed paraffin-embedded tissue specimens were used to construct TMAs, as previously described (1). Briefly, hematoxylin and eosin-stained slides were reviewed by pathologists who were blinded to the patients' clinical characteristics and outcomes. TMAs were constructed using two separate 1.0-mm tissue cores taken from regions of adjacent liver ( $\geq 2$  cm from the edge of the tumor) and the intratumoral regions (a total of four punches for each specimen). TMAs containing the tissue cores were then cut into 5- $\mu$ m sections for IHC staining.

### ***Multiplexed Immunofluorescence Staining***

To investigate heterogeneity among myeloid cells in the TME from different MRS groups, we performed multiplexed immunofluorescence staining with a TSA Fluorescence Kit (Panovue, China), as previously described (2). Different primary antibodies were sequentially applied, followed by incubation with a horseradish peroxidase (HRP)-conjugated secondary antibody and tyramide signal amplification (TSA). Details regarding the antibodies used for IHC and immunofluorescence

staining are provided in **Supplemental Table 16**. The slides were microwave heat-treated after each TSA procedure. Nuclei were stained with DAPI after all antigens had been labeled.

### ***Isolation and culture of blood cells and preparation of culture supernatants from hepatoma cells***

Human neutrophils and monocytes were isolated from peripheral blood of healthy donors, as previously described (3, 4). The purified neutrophils were cultured for 24 hours in DMEM containing 10% human AB serum, supplemented with 15% culture supernatants from hepatoma cells (TSN) as indicated. For monocyte-derived macrophages, CD14<sup>+</sup> monocytes were cultured in DMEM containing 10% human AB serum for 7 days to allow differentiation into macrophages. After differentiation, cells were treated with medium or 15% TSN for 3 days. Cell phenotypes were then examined with flow cytometry. Human hepatoma HepG2 cells were obtained from the American Type Culture Collection. QGY-7701 cells were from Shanghai Institute of Biochemistry and Cell Biology. All cells were tested for mycoplasma contamination using a single-step PCR method, and were maintained in DMEM medium supplemented with 10% FBS (10099-141, Gibco, USA). TSN was prepared by plating  $5 \times 10^6$  tumor cells in 10 mL of complete DMEM medium in 100-mm dishes for 24 hours and thereafter changing the medium to complete medium supplemented with 10% human AB serum. After the incubation, the media were harvested, centrifuged to remove cells, and stored in aliquots at -80°C.

### ***Flow Cytometry***

Flow cytometry was performed as previously described (4, 5). Details regarding the antibodies used for flow cytometry are provided in **Supplemental Table 17**. Data were acquired using a Gallios or a CytoFLEX S flow cytometer (Beckman Coulter, USA) and analyzed with FlowJo Software (BD, USA).

### ***Total RNA Isolation and Gene Expression Microarray Assay***

RNA samples from 21 HCC tumors (MRS<sup>low</sup>,  $n = 10$ ; MRS<sup>high</sup>,  $n = 11$ ; **Supplemental Figure 17A** and **Supplemental Table 11**) were subjected to a gene expression microarray assay. A total of 50–100 mg of tumor tissue was ground with a mortar and pestle in liquid nitrogen and homogenized in TRIzol Reagent (Ambion, USA). Total RNA was extracted according to the manufacturer's instructions and quantified with a Nanodrop Instrument (Thermo Scientific, USA). Total RNA was checked for the RIN to inspect RNA integrity using an Agilent Bioanalyzer 2100 (Agilent Technologies, USA). Qualified total RNA was further purified using a RNeasy mini kit (QIAGEN, Germany) and a RNase-Free DNase Set (QIAGEN, Germany). Total RNA was amplified and labeled by Low Input Quick Amp Labeling Kit, One-Color (Agilent Technologies, USA), following the manufacturer's instructions. Labeled cRNA was purified with a RNeasy mini kit (QIAGEN, Germany) and hybridized onto Agilent whole human genome oligonucleotide microarrays containing 58341 different oligonucleotide probes (SurePrint G3 Human Gene Expression 8 × 60 K Microarray Kit, Agilent Technologies, USA). Slides were scanned using an Agilent Microarray Scanner (Agilent Technologies, US) with default settings.

### **Gene Expression and Functional Enrichment Analyses**

The gene expression microarray data of 21 HCC samples were pre-processed using the R package *limma* (6). Batch effects removal and data normalization was performed based on the surrogate variables analysis (SVA) method (7). We used the R package *sva* to identify and estimate surrogate variables for known and unknown sources of variation in gene expression microarray experiments and then performed data normalization using the *ExpressionNormalizationWorkflow* package. Differential expression analysis was then performed with the *limma* package. Function enrichment analyses, including the gene ontology and gene set enrichment analyses, were performed using the R package *clusterProfiler* (8). Gene sets used for gene set enrichment analysis are provided in **Supplemental Table 12**.

### **TCGA-LIHC Data Analysis**

Transcriptome profiling data from the TCGA-LIHC project and corresponding metadata were downloaded (on December 4, 2018), preprocessed, normalized, and filtered using the R package *TCGAbiolinks* (9). Single-sample gene set enrichment analysis was performed using a non-parametric unsupervised method, called gene set variation analysis (GSVA) with the *GSVA* package. GSVA performs a change in coordinate systems, transforming the data from a gene by sample matrix to a gene set by sample matrix, thereby allowing for the evaluation of pathway enrichment for each sample. The *monocle* package and the Monocle 2 algorithm (10) was used to draw a 'climb trajectory' of MRS estimates across the TCGA-LIHC samples. The up-regulated and down-regulated genes identified with gene expression microarrays (**Supplemental Table 11**) served as marker genes that guide the 'semi-supervised' machine learning progress, as Monocle could augment these markers with other related genes. In this way, the 371 HCCs from the TCGA-LIHC project were ordered in 'pseudotime' based on transcriptional similarities identified by the Monocle 2 algorithm (**Figure 7A**).

### ***Nomogram Construction***

To exemplify the potential use of the MRS in clinical decisions, we constructed two nomograms to predict HCC recurrence and overall patient survival after resection surgery (**Figure 8, A and B**). To do so, we put a panel of prognosis-related parameters into a primary Cox proportional hazards regression model, which includes MRS, age and gender of the patient, level of AFP and ALT in blood, pathological stage, Child–Pugh score, tumor size (diameter), tumor number (singular or multiple), presence of vascular invasion, presence of cirrhosis, presence of tumor capsule, presence of HBV or HCV infection, and the ALBI stage. The fitting model was constructed, examined, and simplified using the R package *rms*. The final fitting model was built on parameters selected using a backward step-down method (with total residual Akaike information criterion as the stopping rule) to identify the variables that remained in the final model. These nomograms were validated in multiple cohorts to obtain unbiased estimates of model performance (discrimination, calibration, and clinical usefulness). The R package *survivalROC* (11) was used for time-dependent receiver

operating characteristic (ROC) analysis. Area under curve (AUC) of the ROC curves were estimated with 1000 × bootstrap resampling for each parameter. Decision curve analysis (DCA) is a method for assessing whether nomogram-assisted decisions may improve patient outcomes (12). DCA estimates clinical usefulness of prediction models on the basis of the threshold probability (i.e., the probability that triggers a medical intervention, equating to the probability at which the harm of a false-positive intervention exceeds the harm of a false-negative non-intervention).

## Supplemental Figures

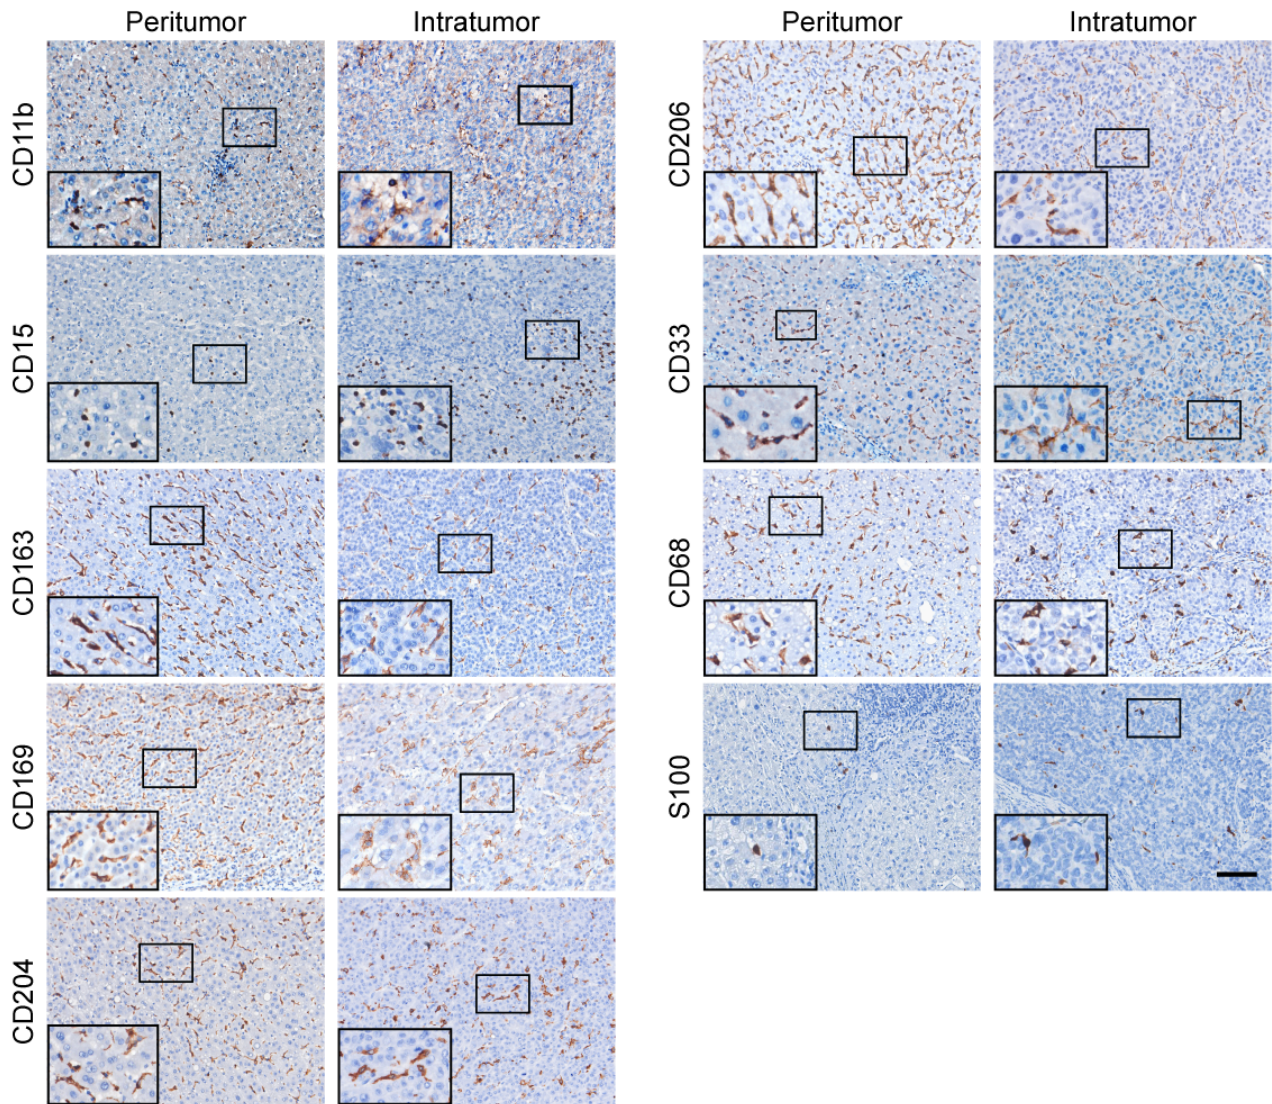

**Supplemental Figure 1. IHC assessment of the 18 myeloid features in HCC.** IHC staining for nine myeloid markers in peritumor liver and intratumor tissues of HCC. Representative images of the histological detection are shown. Scale bar, 100  $\mu$ m.



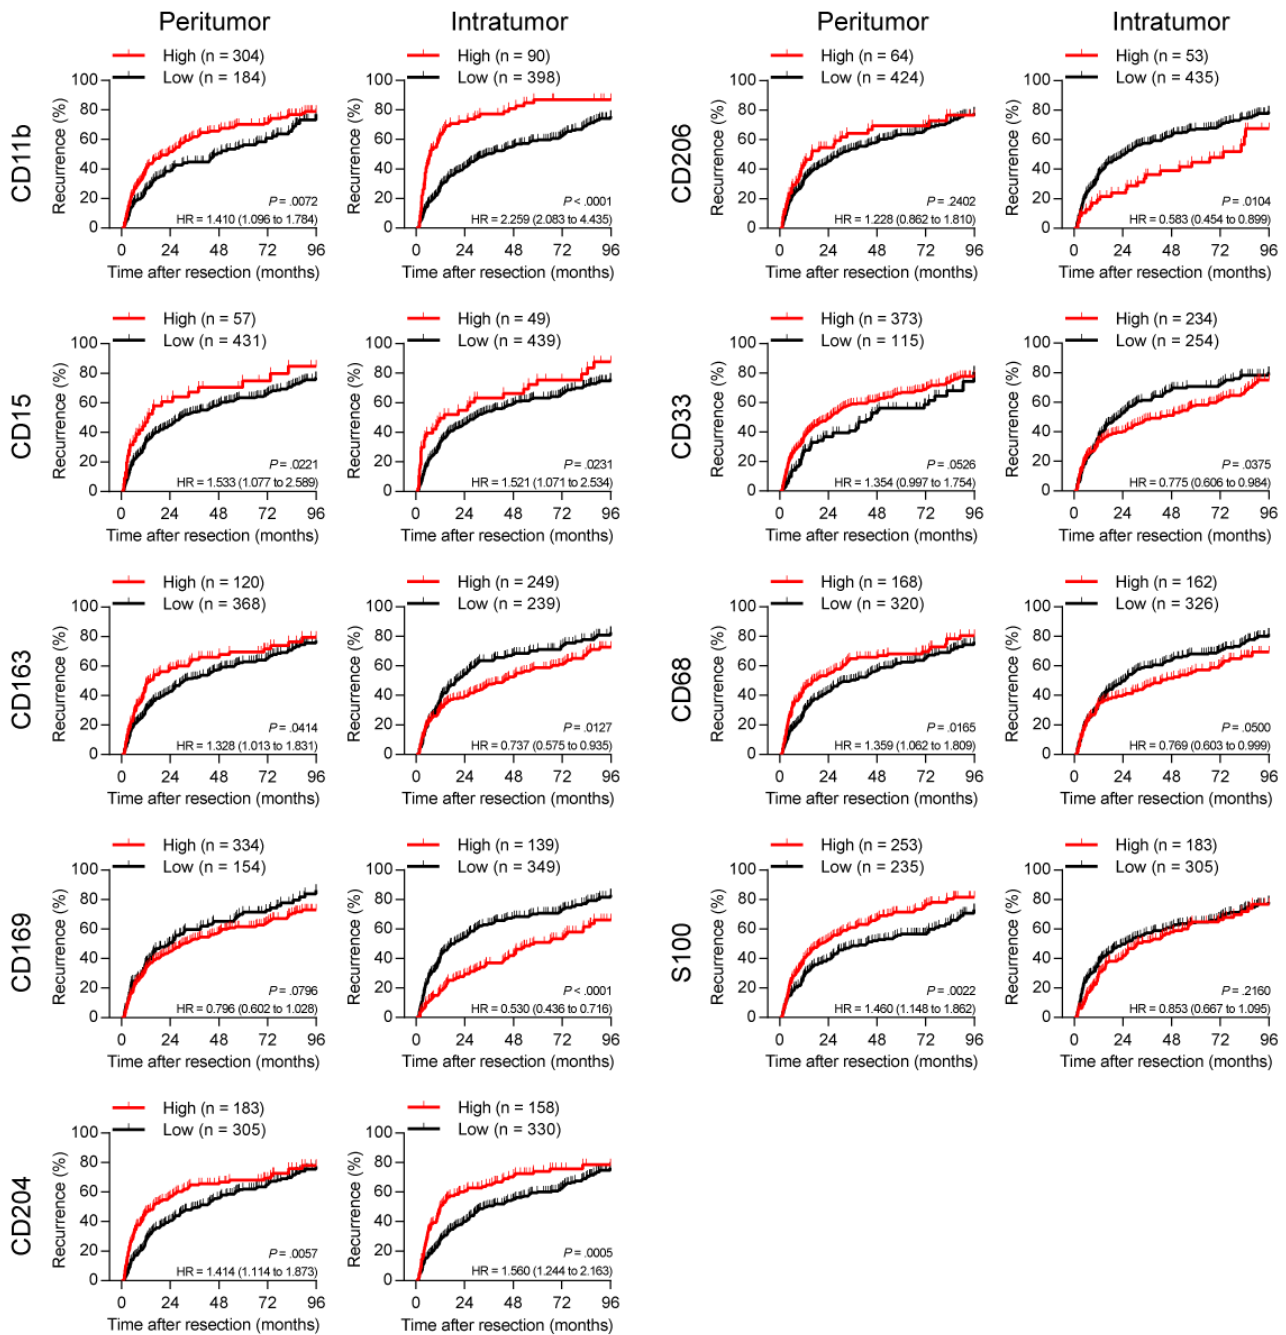

**Supplemental Figure 2. The prognostic relevance of the 18 myeloid features to postsurgery HCC recurrence.** Kaplan-Meier survival analysis of time to recurrence (TTR) in the primary cohort of HCC patients according to expression of the 18 myeloid features. Cutoffs were determined using the X-tile program, similar to that described in **Supplemental Figure 7**. *P* values were calculated using log-rank tests.

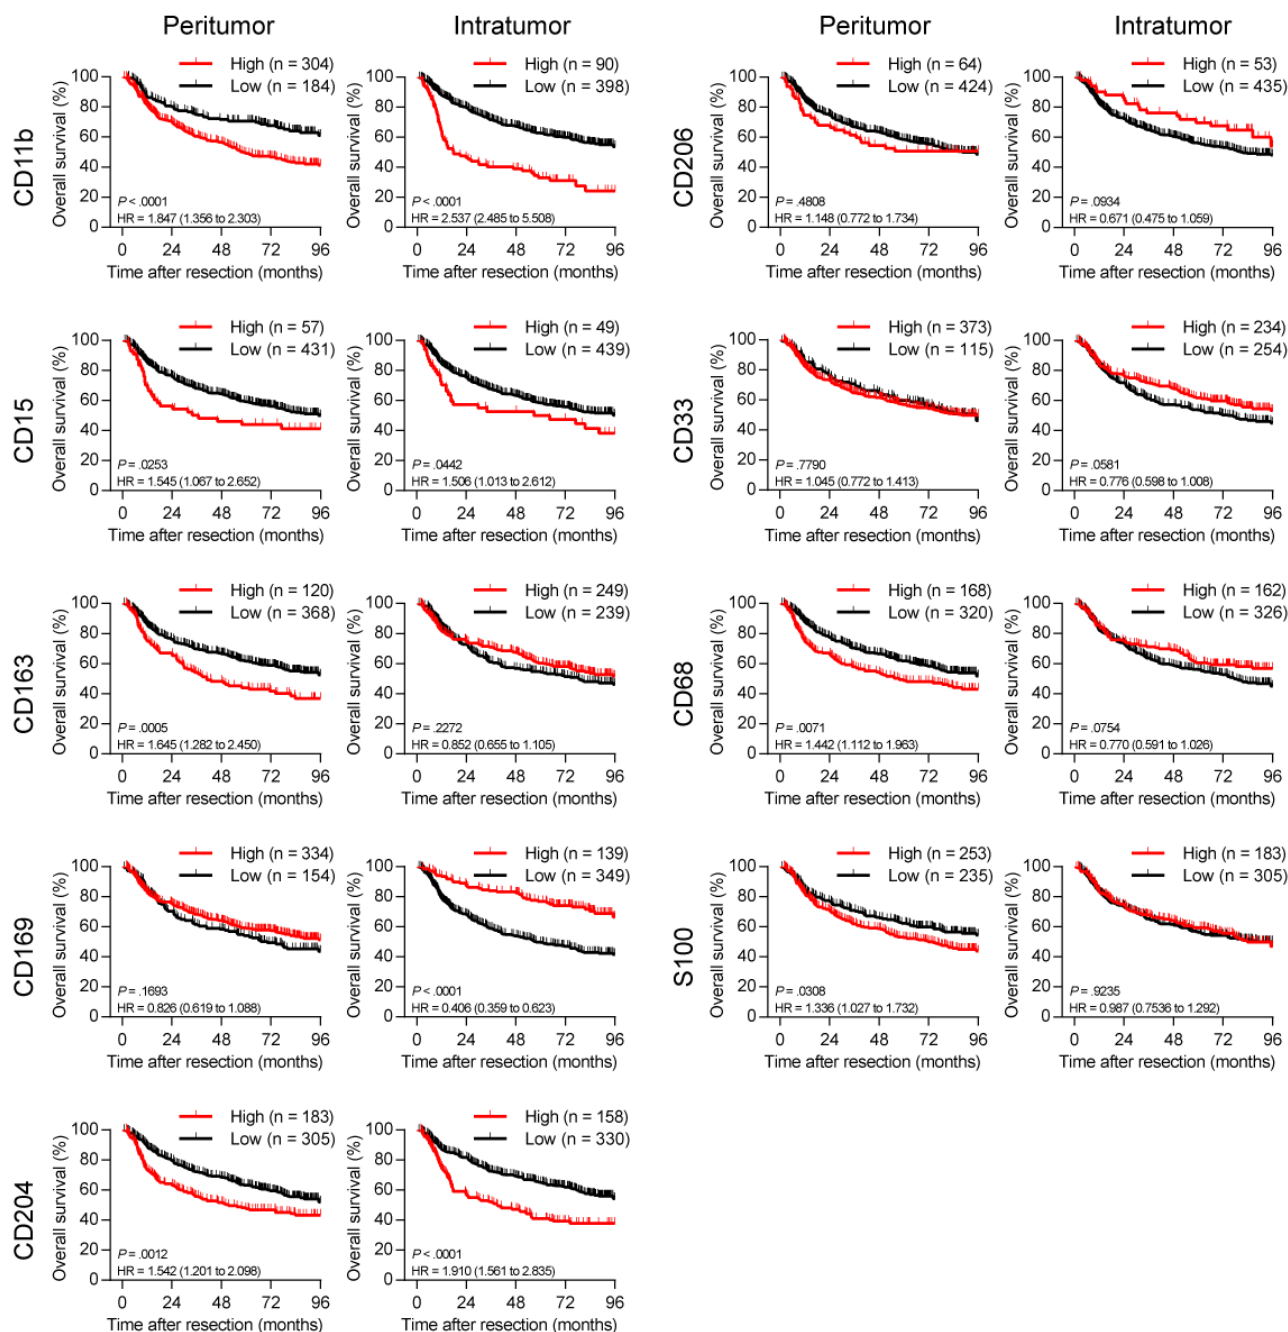

**Supplemental Figure 3. The prognostic relevance of the 18 myeloid features to the postsurgery overall survival of HCC patients.** Kaplan-Meier survival analysis of overall survival (OS) in the primary cohort of HCC patients according to expression of the 18 myeloid features. Cutoffs were determined using the X-tile program, similar to that described in **Supplemental Figure 7**. *P* values were calculated using the log-rank tests.

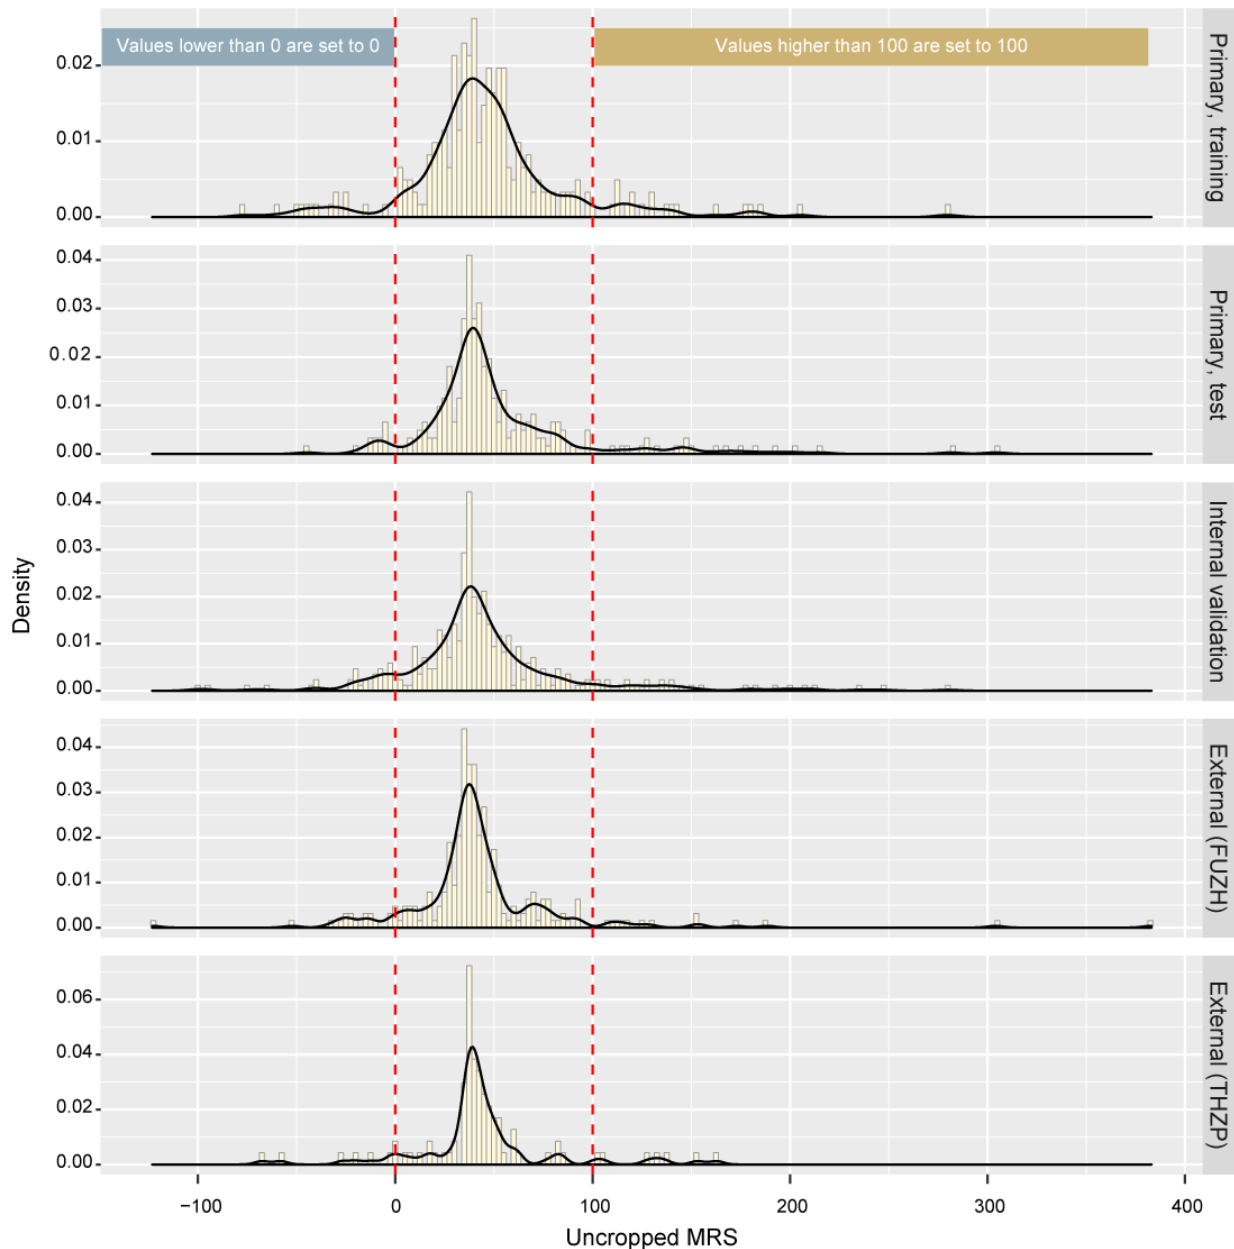

**Supplemental Figure 4. The distribution of uncropped MRS values.** The Lasso Cox regression model was built as indicated in **Figure 2**. The penalized coefficients are 0.000965 and -0.000636 for CD11b<sub>T</sub> and CD169<sub>T</sub>, respectively. The cord formula,  $0.000965 \times \text{CD11b}_T - 0.000636 \times \text{CD169}_T$ , was multiplied by the constant 166.67, and 35 was added to fit in a distribution mainly in the range from 0–100, resulting in the final scoring formula as follows:  $\text{MRS} = 0.161 \times \text{CD11b}_T - 0.106 \times \text{CD169}_T + 35$ . The distribution of the uncropped MRS values is shown. To facilitate further analysis, an MRS lower than 0 was assigned the value of 0, and an MRS higher than 100 was assigned the value of 100, as indicated in this figure.

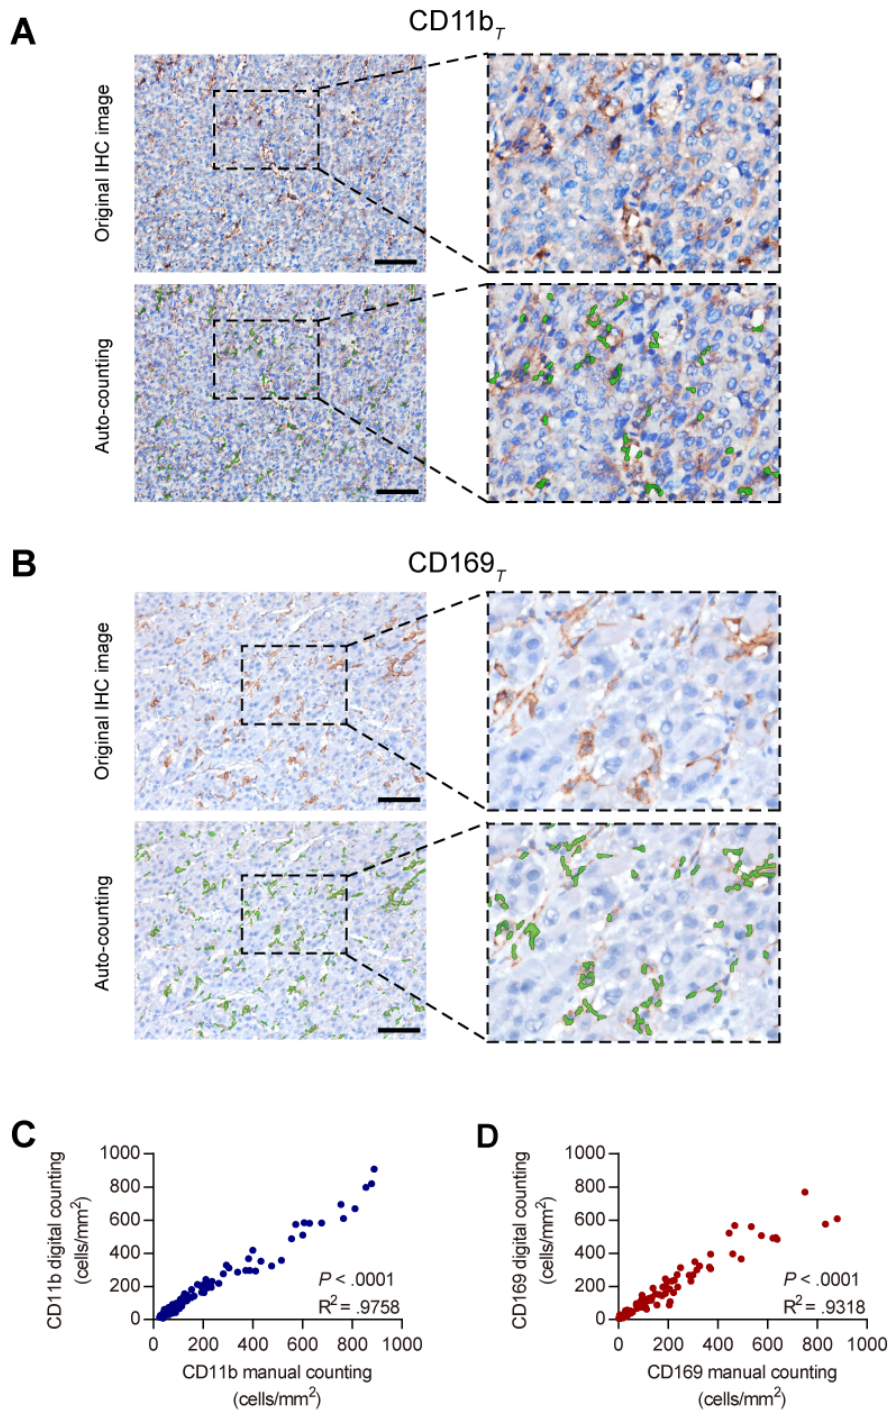

**Supplemental Figure 5. Standardized image analysis and automatic cell counting. (A–B)**

Representative examples of CD11b and CD169 immunostaining in intratumor tissues are shown as original IHC images. Stained cells represented in green with InForm Cell Analysis 2.2 (Perkin-Elmer, USA) are shown as “Auto-counting”. Subscript “T”, intratumor tissue. Scale bar, 100  $\mu$ m. (C–D) Correlation analysis of manual and digital counting of cells positive for CD11b and CD169. The  $R^2$  and  $P$  values from results of Pearson correlation analyses are shown.

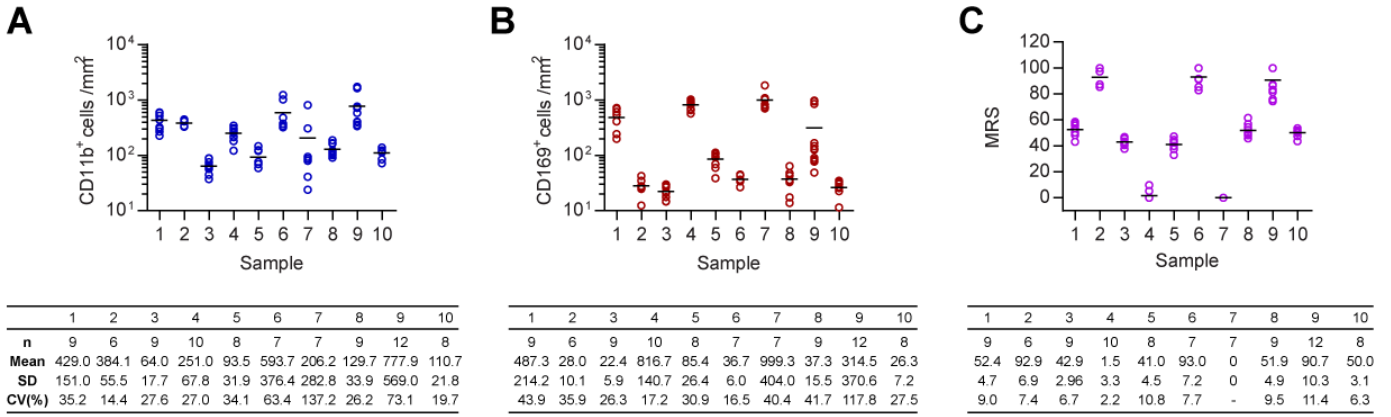

**Supplemental Figure 6. Assessing the variance of CD11b<sub>T</sub>, CD169<sub>T</sub>, and MRS values.** A separate set of 10 HCC patients who underwent curative resection at the SYSUCC was included to evaluate the reproducibility of TMA core-based IHC features. At least six blocks from the intratumoral area of each tumor node were collected. The numbers of CD11b<sup>+</sup> cells and CD169<sup>+</sup> cells and the values of the MRS were determined. The mean, standard deviation (SD) and coefficients of variation (CV) of values estimated based on different blocks of the same tumor node are shown.

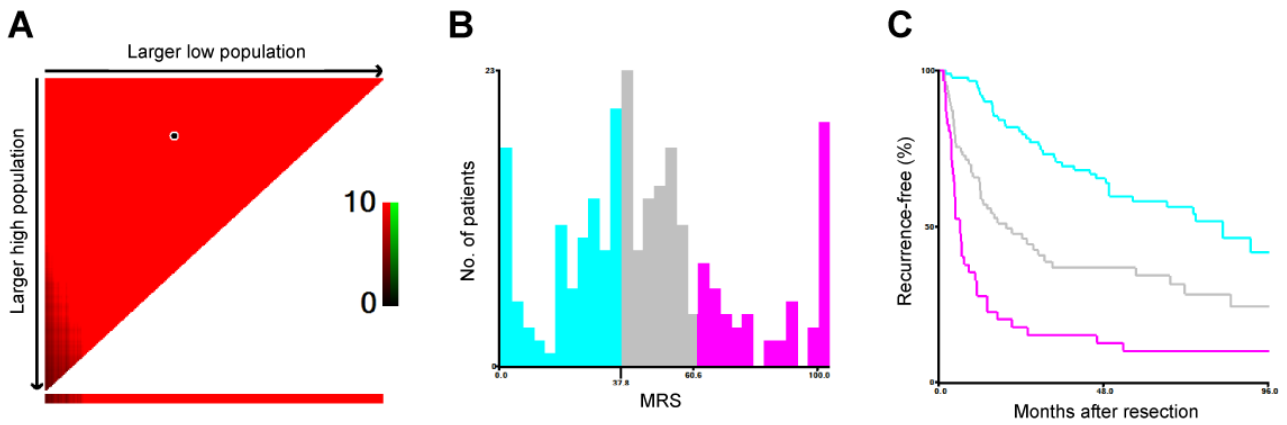

**Supplemental Figure 7. The optimum cutoff values of the MRS were determined using the X-tile program. (A)** The X-tile plot shows the  $\chi^2$  log-rank values produced when dividing the training cohort with two cut-points, producing subsets of patients with low, intermediate, and high MRSs (13). The X-axis represents all potential cutoff points from low to high (left to right) that define a subset with low MRS; the Y-axis represents cut-points from high to low (top to bottom) that define a subset with high MRS. Coloration of the plot represents the strength of the association at each division. Red represents a positive association between the MRS and recurrence; green represents an inverse association. The chosen cutoff point is highlighted by the black/white circle. **(B)** Distribution of the MRS in the training cohort. The cutoff point is shown on a histogram for the training cohort. **(C)** The discriminatory power of the three subgroups of patients divided according to the cutoff values determined in **(A)** is shown as a Kaplan-Meier plot.

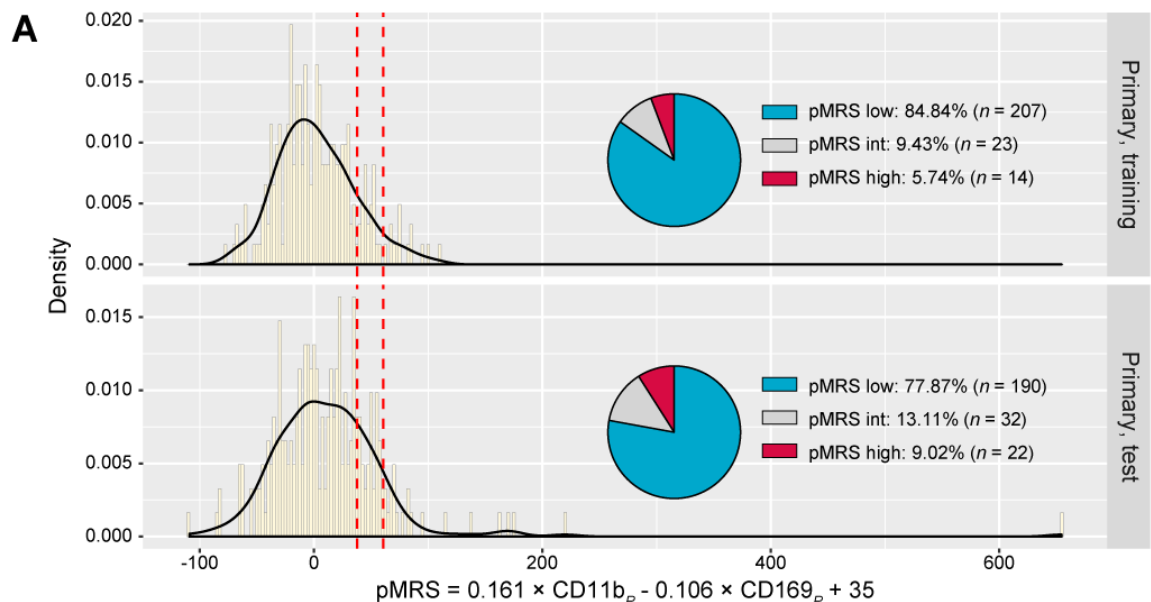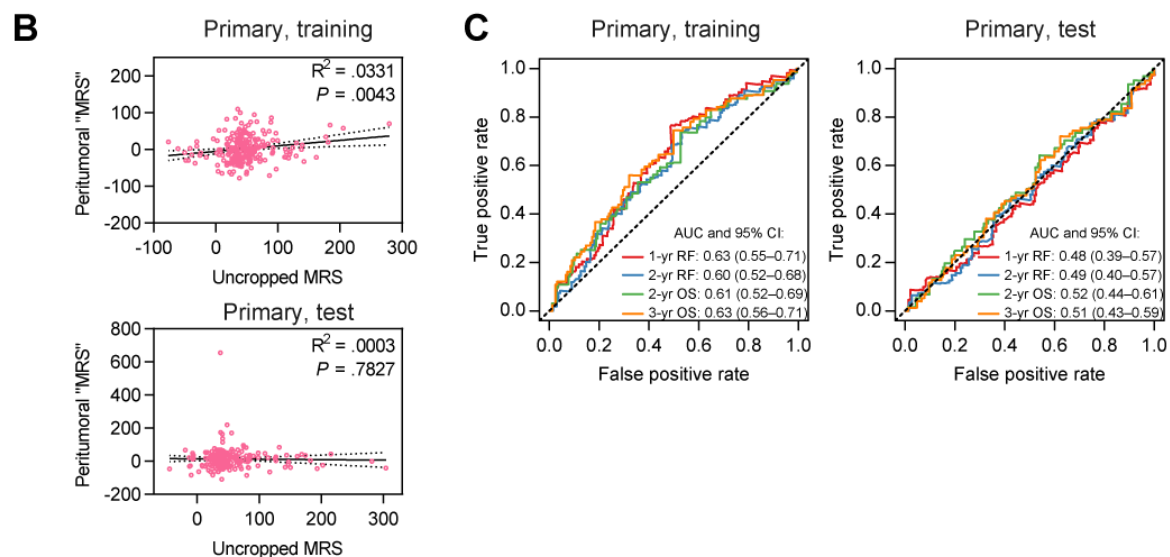

**Supplemental Figure 8. The distribution of peritumoral MRS (pMRS) values.** The peritumoral "MRS" (referred to as pMRS) was calculated using a similar formula of the MRS as follows:  $pMRS = 0.161 \times CD11b_p - 0.106 \times CD169_p + 35$ . **(A)** The distribution of the pMRS values in the primary-training and primary-test cohorts are shown. The red dash lines indicate the first and second cut-off point of the MRS: 37.9 and 60.6. The vast majority of the pMRS values are under the cutoff of 37.9. **(B)** Correlation between MRS and pMRS. The  $R^2$  and  $P$  values from results of Pearson correlation analyses are shown. **(C)** ROC analysis of the prognostic relevance of the pMRS to postsurgery recurrence and survival. The 95% confidence intervals (95% CI) of the area under curve (AUC) was calculated using 1000  $\times$  bootstrap estimates. AUC, area under the ROC curve; RF, recurrence free; ROC curve, receiver operator characteristic curve.

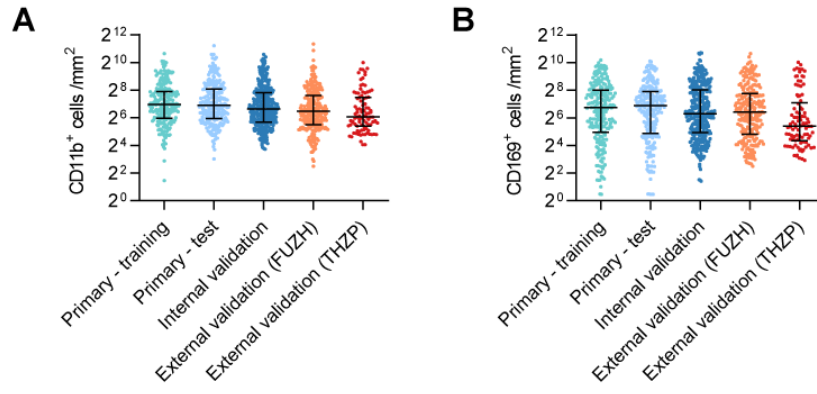

**Supplemental Figure 9. Quantification of CD11b<sub>T</sub> and CD169<sub>T</sub> densities in each cohort.** (A) The distribution of intratumoral CD11b<sup>+</sup> cell densities in each cohort. Error bar, median and IQR. (B) The distribution of intratumoral CD169<sup>+</sup> cell densities in each cohort. Error bar, median and IQR.



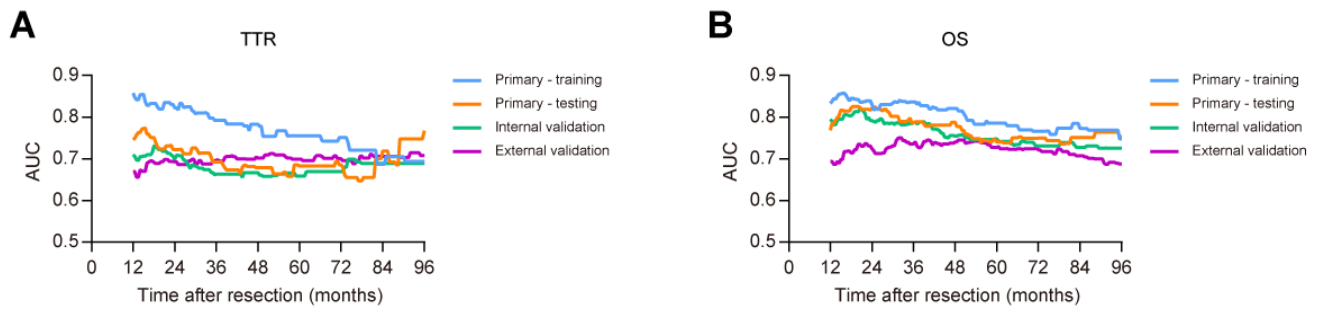

**Supplemental Figure 10. Area under the curve (AUC) of time-dependent ROC curves for the MRS in the four cohorts. (A and B) AUC values of ROC curve (Y-axis) for MRS to predict TTR (A) and OS (B) at different time points (X-axis).**

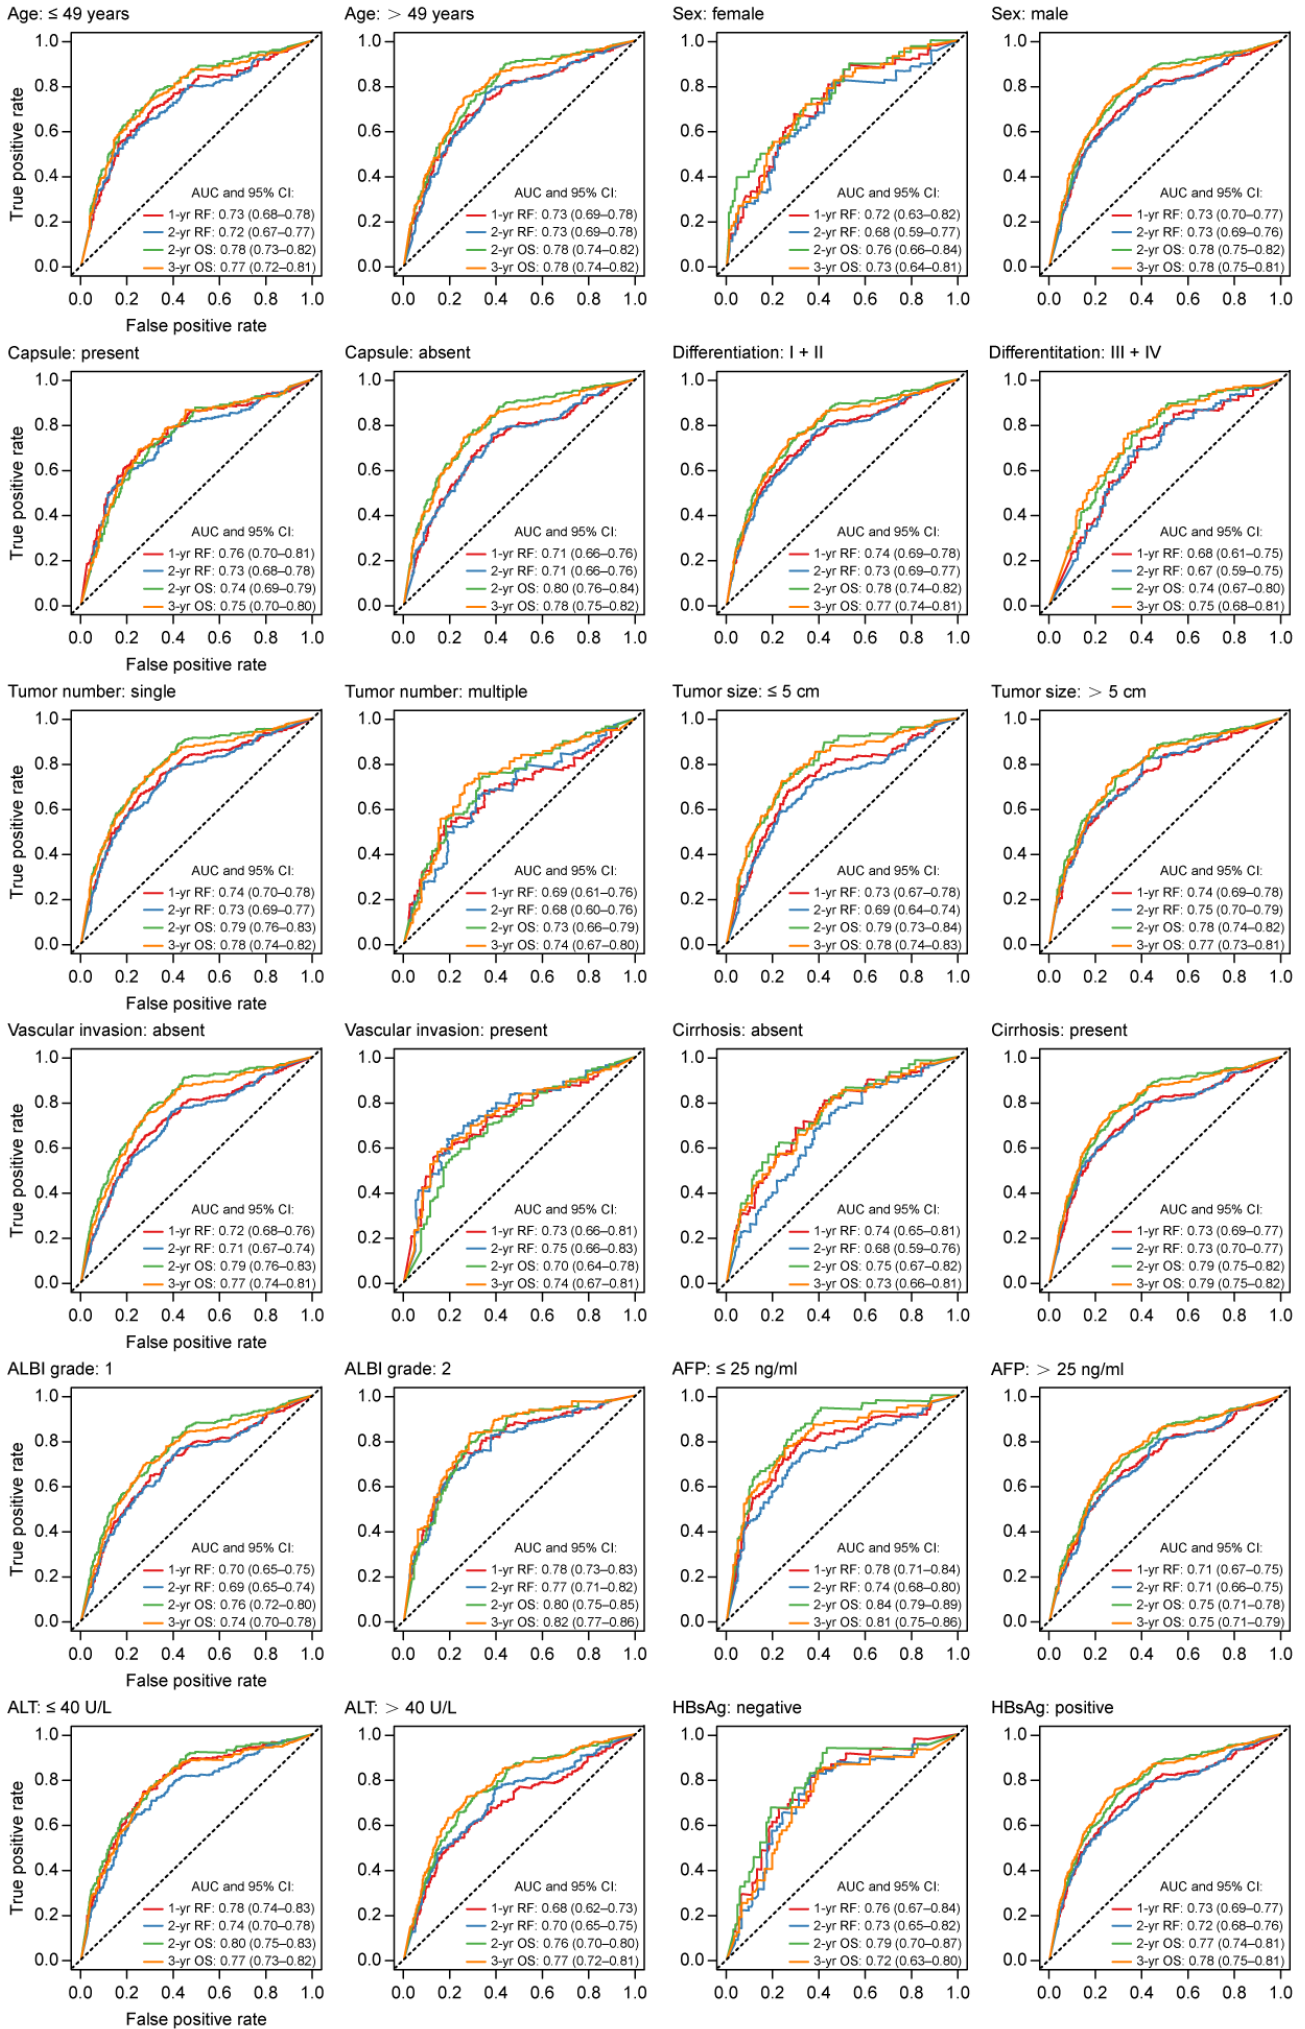

**Supplemental Figure 11. ROC analysis of the relevance of the continuous MRS values to HCC prognosis in the entire cohort stratified by clinicopathological risk factors.** Patients in the entire cohort were divided into subgroups according to indicated clinicopathological risk factors. The relevance of the MRS to 1-year recurrence, 2-year recurrence, 2-year OS, and 3-year OS was analyzed. The 95% confidence intervals (95% CI) of the area under curve (AUC) was calculated using 1000 bootstrap estimates. AFP, alpha-fetoprotein; ALBI, albumin-bilirubin grade; ALT, alanine aminotransferase; HBsAg, surface antigen of the hepatitis B virus.



**Supplemental Figure 12. Kaplan-Meier survival analysis of time to recurrence (TTR) in the entire cohort of HCC patients according to the MRS classifier, as stratified by clinicopathological risk factors.** Patients in the entire cohort were divided into subgroups according to indicated clinicopathological risk factors. *P* values were calculated using the log-rank test for trend. AFP, alpha-fetoprotein; ALBI, albumin-bilirubin grade; ALT, alanine aminotransferase; HBsAg, surface antigen of the hepatitis B virus.



**Supplemental Figure 13. Kaplan-Meier survival analysis of overall survival (OS) in the entire cohort of HCC patients according to the MRS classifier, stratified by clinicopathological risk factors.** Patients in the entire cohort were divided into subgroups according to indicated clinicopathological risk factors. *P* values were calculated using the log-rank test for trend. AFP, alpha-fetoprotein; ALBI, albumin-bilirubin grade; ALT, alanine aminotransferase; HBsAg, surface antigen of the hepatitis B virus.

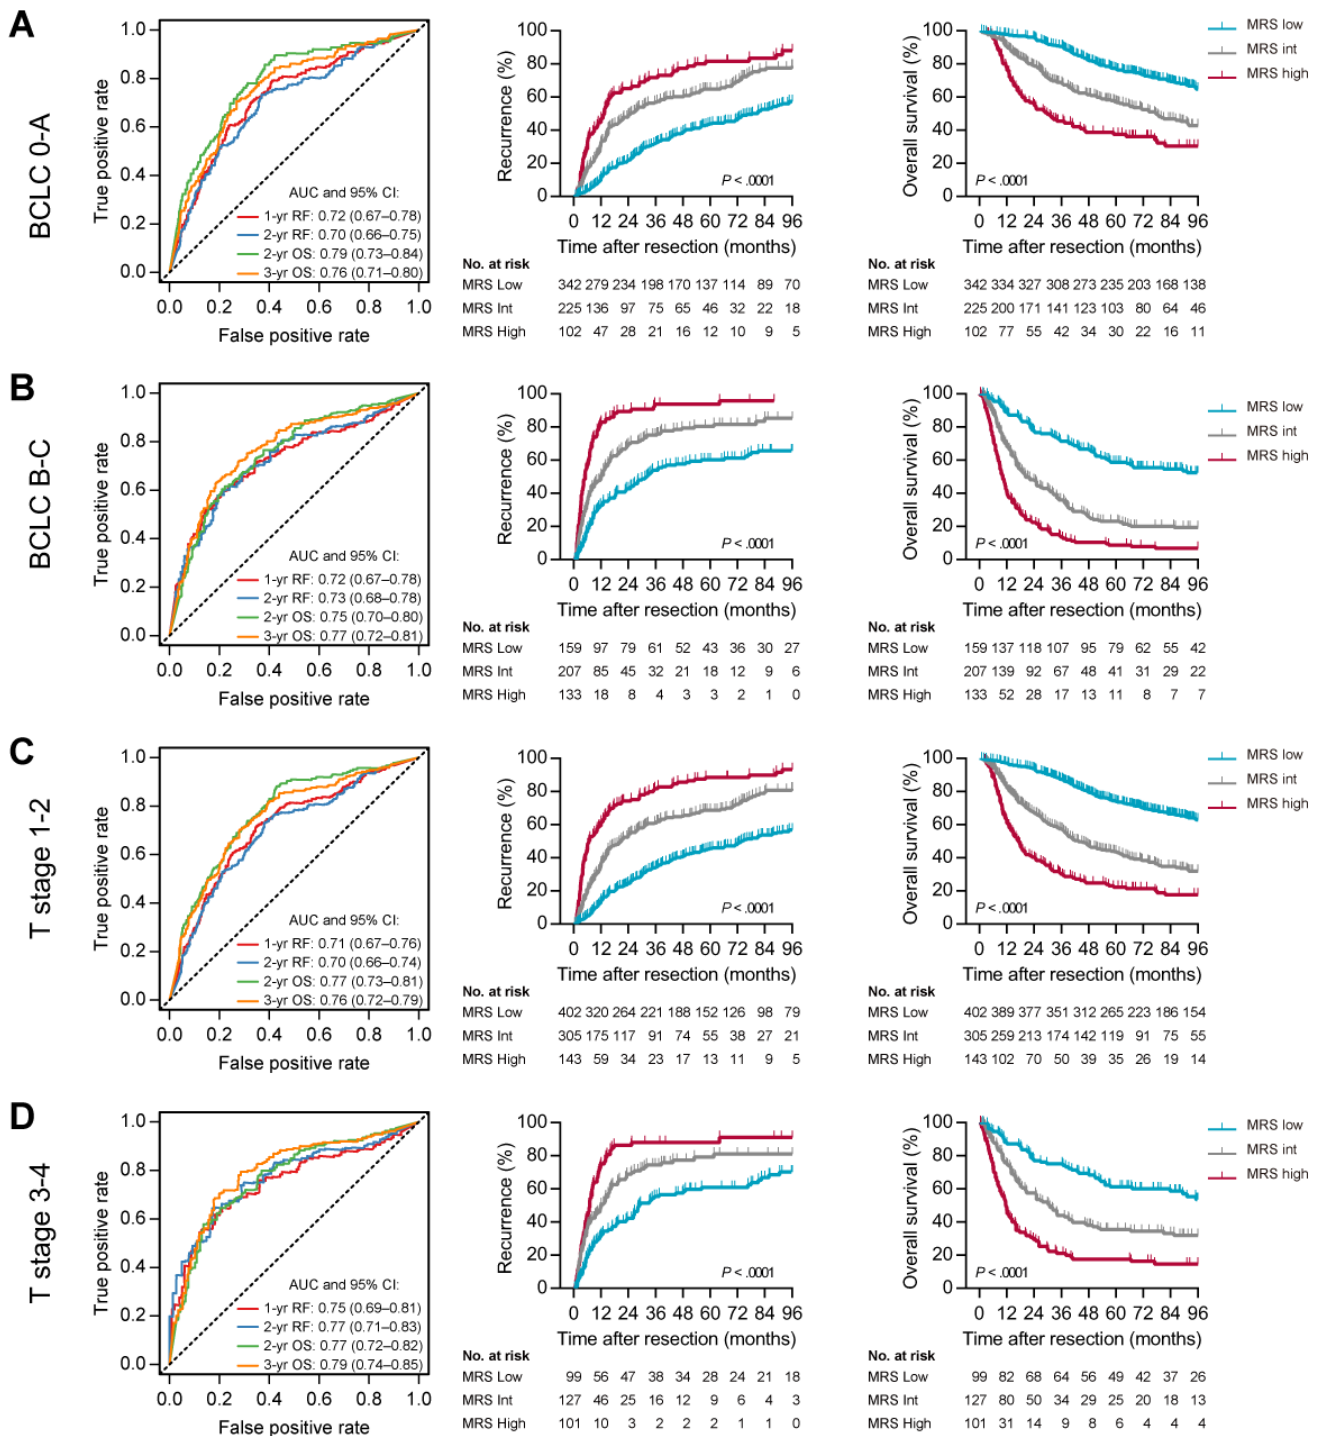

**Supplemental Figure 14. ROC and Kaplan-Meier survival analyses of TTR and OS according to the MRS in subgroups of HCC patients, stratified by pathological staging. (A and B) Patients in the entire cohort were divided into subgroups according to BCLC staging. (C and D) Patients in the entire cohort were divided into subgroups according to T staging (AJCC). The performance of MRS in predicting TTR and OS in subgroups was assessed with ROC and Kaplan-Meier analyses. The 95% CI of the AUC was calculated using 1000 bootstrap estimates. *P* values were calculated using the log-rank test for trend.**



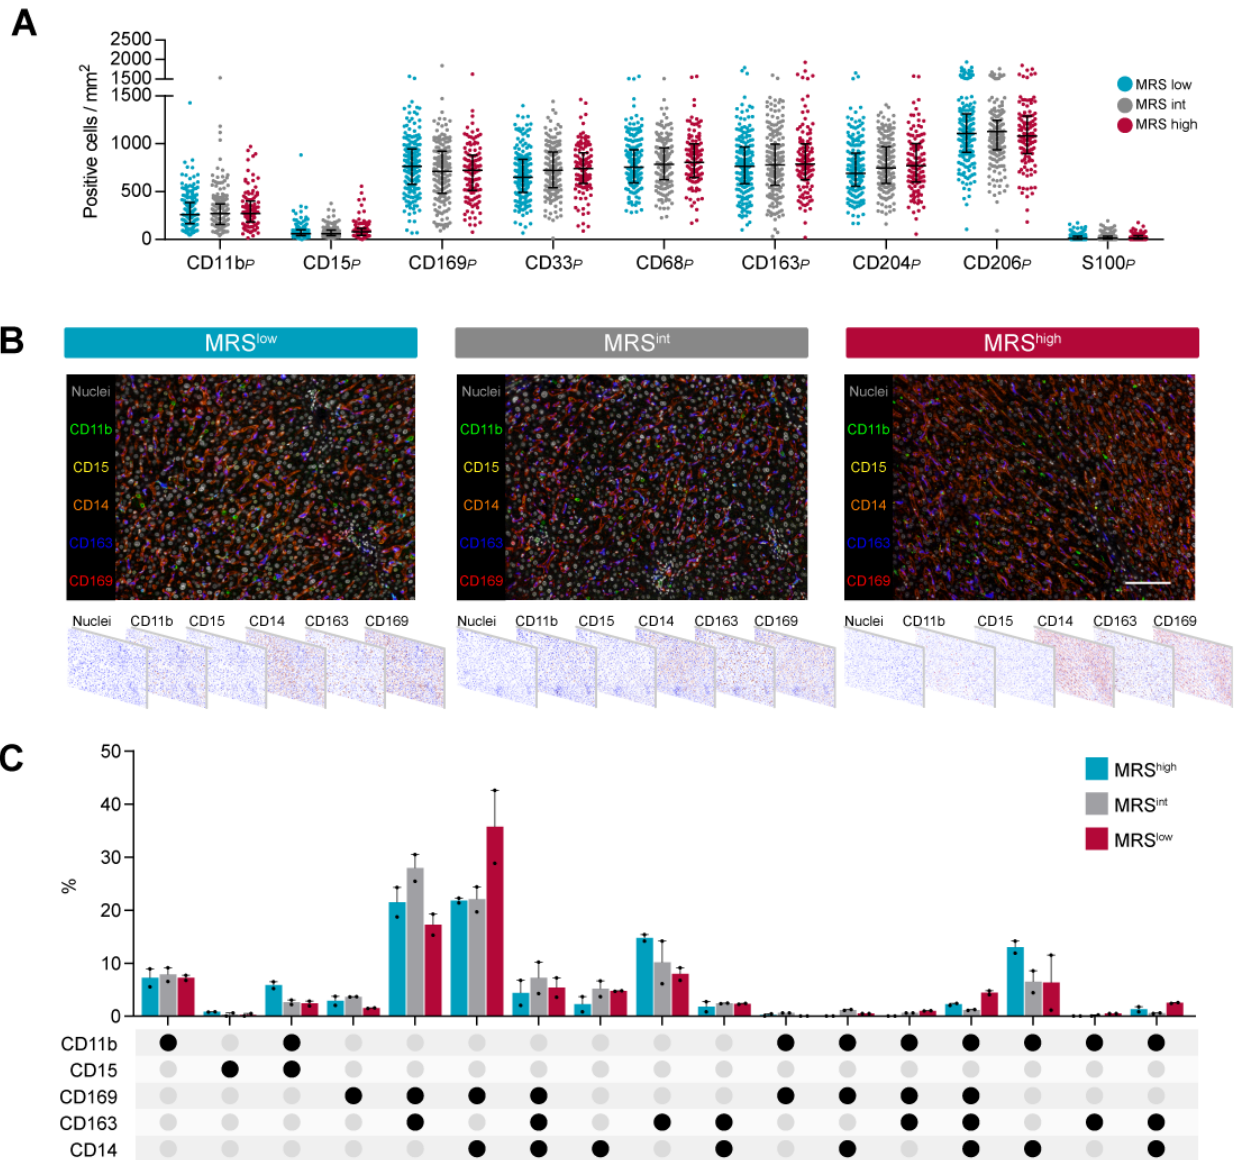

**Supplemental Figure 15. The composition of the myeloid cell contexture in the peritumoral liver tissue of HCC. (A)** Densities of myeloid subsets in peritumoral (P) area of tumors with low, intermediate and high MRS estimates. Error bar, median and IQR. \* $P < 0.05$ ; ns, not significant (two-way ANOVA followed by Tukey's test). **(B)** Representative multiplexed IF images show that the myeloid cell subtype composition of the peritumoral tissue is similar in different MRS subgroups. Scale bar, 100  $\mu\text{m}$ . **(C)** Different compositions of myeloid contextures in  $\text{MRS}^{\text{low}}$  ( $n = 2$ ),  $\text{MRS}^{\text{int}}$  ( $n = 2$ ), and  $\text{MRS}^{\text{high}}$  ( $n = 2$ ) tissues. Data are shown in an UpSet plot. Each row corresponds to one myeloid marker, and each column (a subgroup including three bars) corresponds to a subset of cells with the indicated pattern of marker co-expression. Circles are either light-gray, indicating that this subset was negatively/marginally stained for that marker, or black, showing this subset expressed that marker. Error bar, mean and SEM.

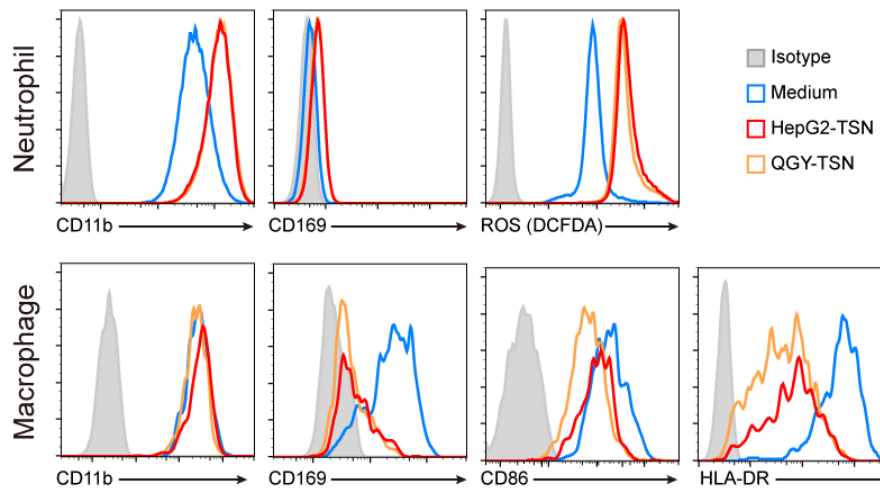

**Supplemental Figure 16. The impact of tumor cell culture supernatant on myeloid cell phenotype.**

Freshly isolate peripheral blood CD15<sup>+</sup> neutrophils and CD14<sup>+</sup> monocyte-derived macrophages were stimulated with HCC tumor cell culture supernatant (TSN) or control medium. Cell phenotypes were then examined with flow cytometry. ROS, reactive oxygen species.

**A**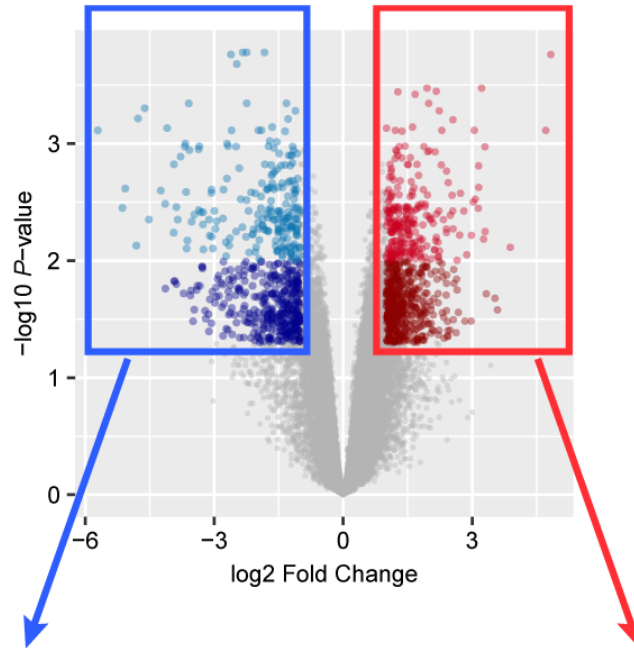**B**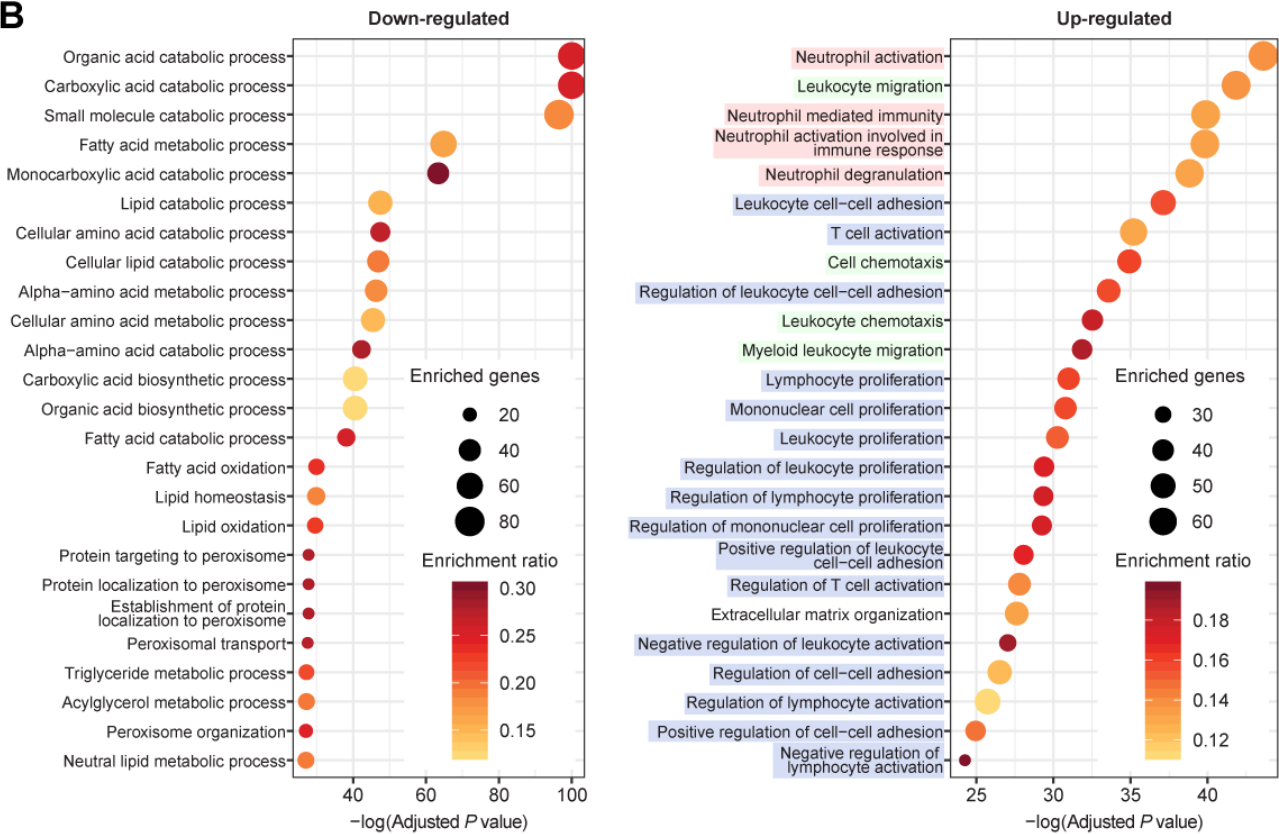

**Supplemental Figure 17. Differential gene expression analysis and GO annotation.** (A) The volcano plot shows  $P$  values adjusted by the Benjamini–Hochberg (BH) method and fold changes in gene expression ( $MRS^{\text{high}}$  vs  $MRS^{\text{low}}$ ). (B) The 25 top GO terms enriched in downregulated (left) and upregulated (right) genes are shown. Immune-related GO terms are shaded with different colors according to the subgroups of activities, as described in **Supplemental Figure 18A**.

**A**

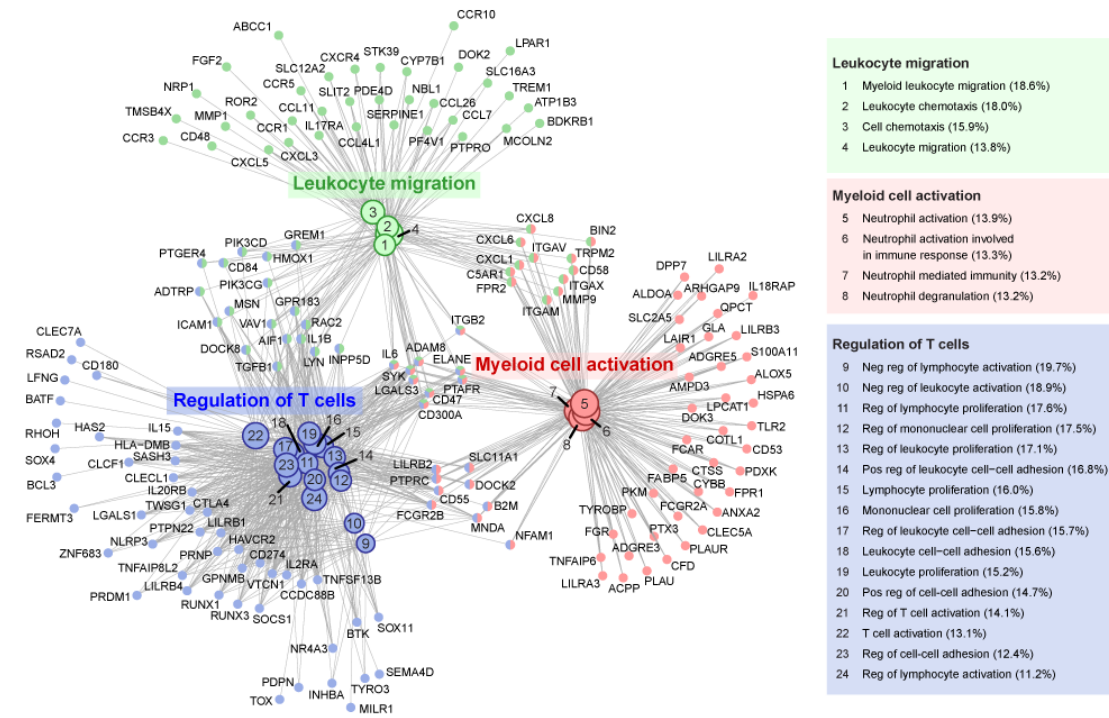

**B**

PD-L1 < 5% in both macrophages and tumor cells

PD-L1 < 5% in macrophages, PD-L1 ≥ 5% in tumor cells

PD-L1 ≥ 5% in macrophages, PD-L1 < 5% in tumor cells

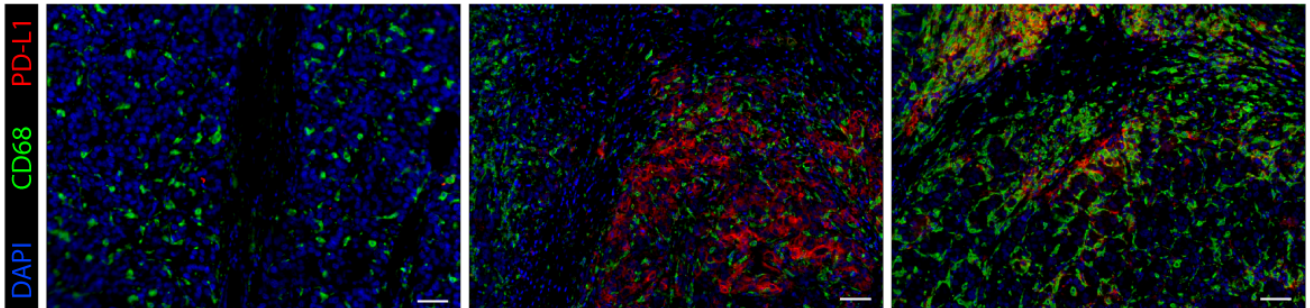

**C**

| No. (% of row) | PD-L1 < 5% macrophages | PD-L1 ≥ 5% macrophages | Total | <i>P</i>                   |
|----------------|------------------------|------------------------|-------|----------------------------|
| MRS low        | 127 (86%)              | 21 (14%)               | 148   | 0.0033                     |
| MRS int        | 142 (87%)              | 22 (13%)               | 164   | ( $\chi^2$ test)           |
| MRS high       | 70 (71%)               | 28 (29%)               | 98    | 0.0075                     |
| Total          | 339                    | 71                     | 410   | ( $\chi^2$ test for trend) |

| No. (% of row) | PD-L1 < 5% tumor cells | PD-L1 ≥ 5% tumor cells | Total | <i>P</i>                   |
|----------------|------------------------|------------------------|-------|----------------------------|
| MRS low        | 123 (83%)              | 25 (17%)               | 148   | 0.0001                     |
| MRS int        | 155 (95%)              | 9 (5%)                 | 164   | ( $\chi^2$ test)           |
| MRS high       | 75 (77%)               | 23 (23%)               | 98    | 0.3555                     |
| Total          | 353                    | 57                     | 410   | ( $\chi^2$ test for trend) |

**Supplemental Figure 18. A high MRS indicates a more suppressive immune microenvironment.**

(A) The gene-concept network of top enriched immune-related GO terms and genes involved in MRS<sup>high</sup> HCCs, corresponding to **Supplemental Figure 17B**. (B) Paraffin-embedded HCC tumor tissue sections were subjected to TSA-IHC staining using anti-human CD68 and anti-human PD-L1 antibodies. Images were obtained using the Vectra System and analyzed by InForm image analysis software. Representative images are shown. Scale bar, 50  $\mu$ m. (C) Correlation between the MRS grouping and PD-L1 expression on tumor cells (left) or macrophages (right) was examined with  $\chi^2$  tests.

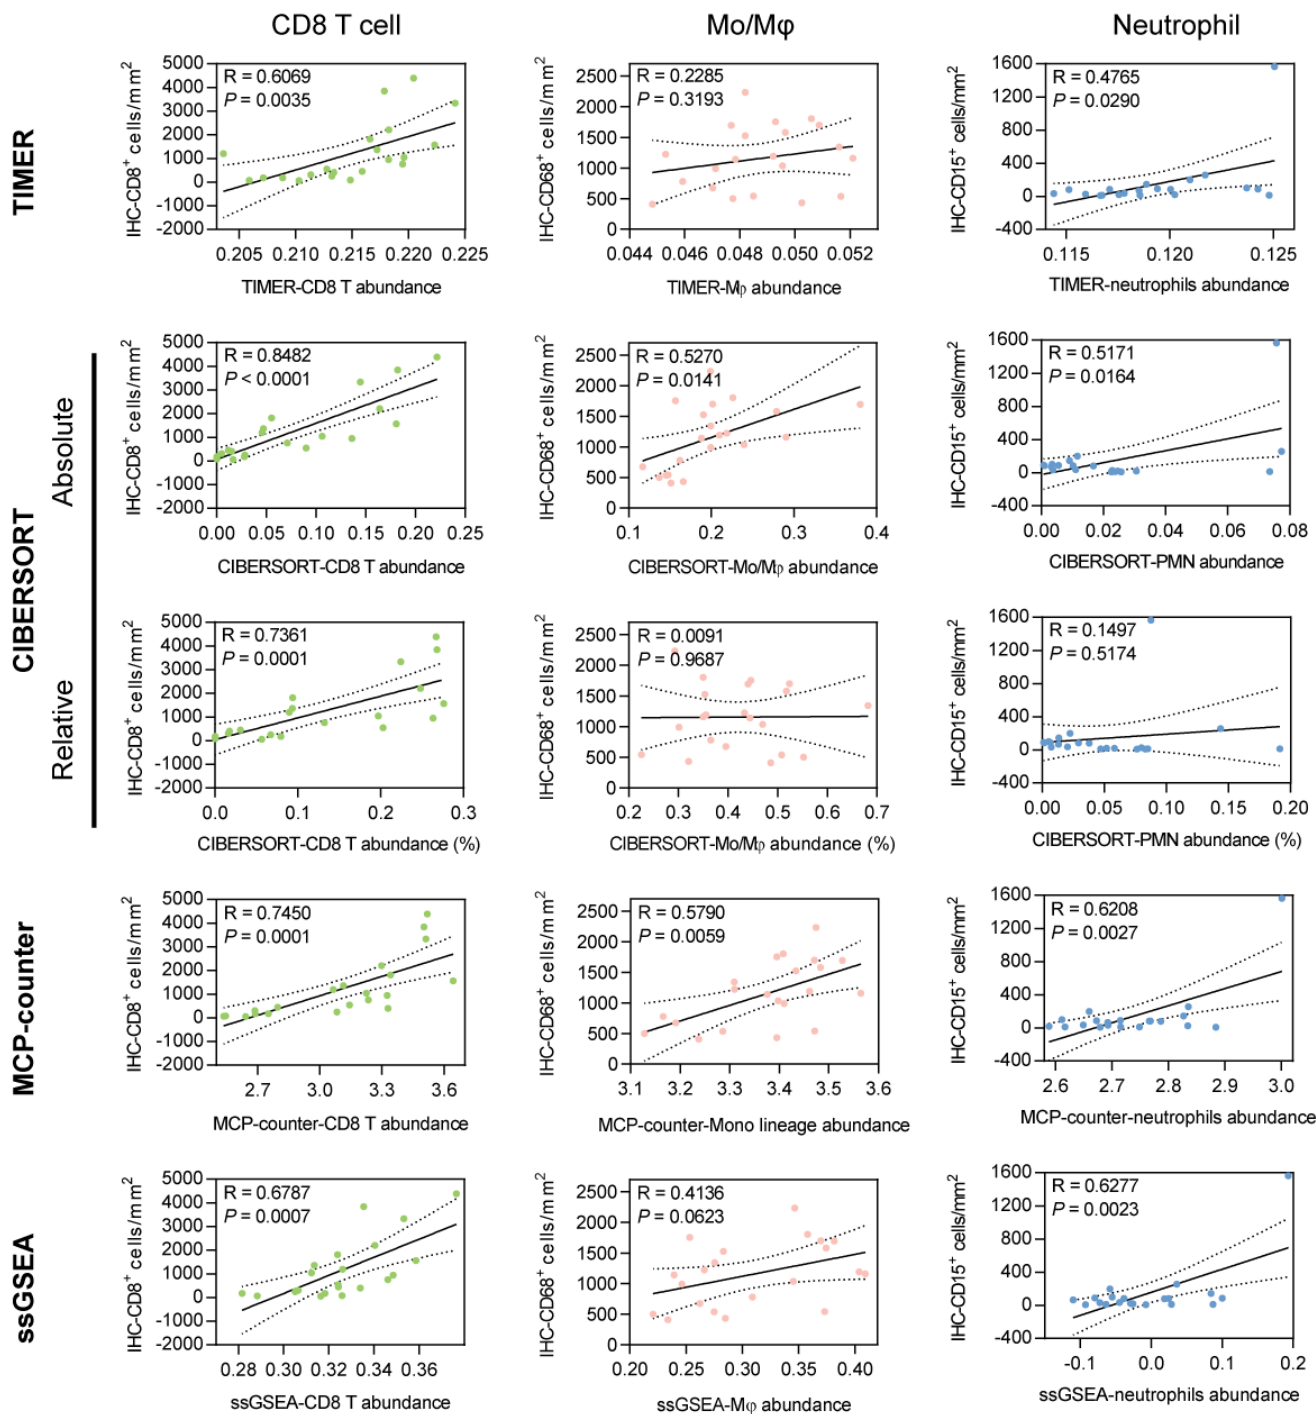

**Supplemental Figure 19. Correlation between bioinformatic quantitation of tumor-infiltrating immune cells and the results of *in situ* immunotyping.** Transcriptomic profiling of 21 bulk HCC tissues with gene expression microarray was processed using different computational methods including TIMER (14), CIBERSORT (15) (using both the relative and absolute modes), MCP-counter (16) and single-cell gene-set enrichment analysis (ssGSEA) along with published human immune cell-specific gene sets (17). Data correlation was assessed by Pearson correlation tests.

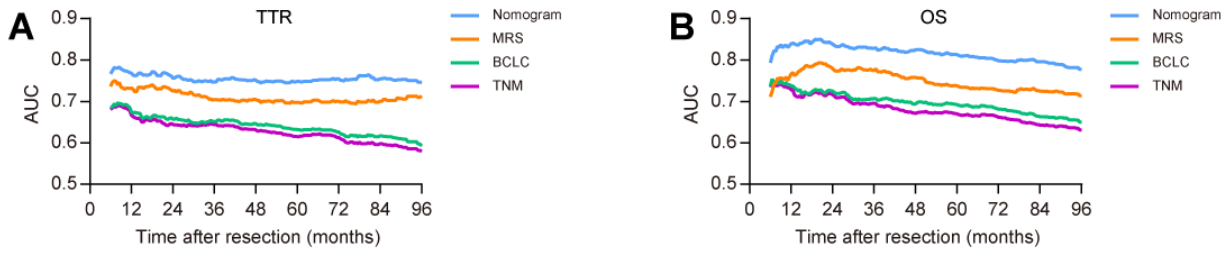

**Supplemental Figure 20. Area under the curve (AUC) of time-dependent ROC curves for the MRS, BCLC staging, and TNM staging in the entire cohort. (A and B) AUC values of the ROC curve analysis for the MRS, BCLC staging, and TNM staging to predict TTR (A) and OS (B) at different time points.**

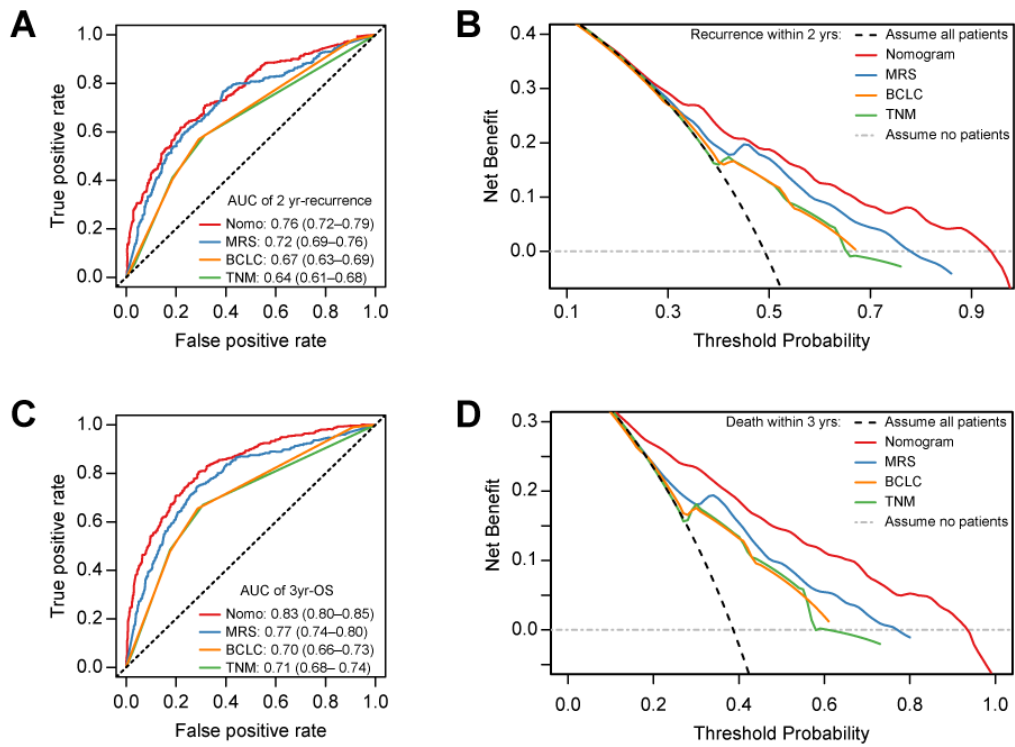

**Supplemental Figure 21. The discrimination and clinical usefulness of MRS-based nomograms.**

(A-B) Time-dependent ROC curve analysis (A) and the decision curve analysis (B) of the TTR nomogram predicting 2-year recurrence in the entire cohort, compared with the MRS, BCLC staging, and TNM staging. (C-D) Time-dependent ROC curve analysis (C) and the decision curve analysis (D) of the OS nomogram predicting 3-year survival in the entire cohort compared with the MRS, BCLC staging, and TNM staging. AUC, area under the curve. The AUC is indicated as the mean and 95% CI, estimated using 1000 × bootstrap resampling.

## Supplemental Tables

**Supplemental Table 1. Candidate Myeloid Markers**

| Markers        | Myeloid subsets                                                                                          | References                                                                                                                        |
|----------------|----------------------------------------------------------------------------------------------------------|-----------------------------------------------------------------------------------------------------------------------------------|
| CD11b,<br>CD33 | Common myeloid markers, widely expressed on MDSCs, monocytes, neutrophils, and subsets of macrophages    | Gabrilovich and Nagaraj, et al. (2009)(18); Bronte, et al. (2016)(19); Okita, et al. (2014)(20); Cui, et al. (2013)(21)           |
| CD68           | Pan-macrophage marker                                                                                    | Holness & Simmons. (1993)(22); Ding, et al. (2009)(23); Kuang, et al. (2010)(24); Fan, et al. (2014)(25); Kong, et al. (2013)(26) |
| CD169          | Anti-tumoral M $\phi$ marker associated with improved prognosis in HCC                                   | Zhang, et al. (2016)(27); Li, et al. (2017)(28)                                                                                   |
| CD163          | M2-macrophage associated marker                                                                          | Jensen, et al. (2009)(29); Kong, et al. (2013)(26); Yeung, et al. (2015)(30)                                                      |
| CD204          | M2-macrophage associated marker, correlated with poor outcomes in multiple types of cancer including HCC | Wang, et al. (2015)(31); Li, et al. (2017)(28); Hou, et al. (2014)(32)                                                            |
| CD206          | M2-macrophage associated marker, indicating a poor prognosis in various malignancies including HCC       | Shu, et al. (2016)(33); Dong, et al. (2016)(34); Tan-Garcia, et al. (2017)(35)                                                    |
| CD15           | Neutrophils                                                                                              | Kuang, et al. (2011)(36); Li, et al. (2011)(37); Zhou, et al. (2012)(38); He, et al. (2016)(39)                                   |
| S100           | Dendritic cells                                                                                          | Ouyang, et al. (2016)(40)                                                                                                         |



**Supplemental Table 2.** Clinicopathological Characteristics of the HCC Patients in Each Cohort

| Characteristics       | Primary training |       | Primary test |       | Internal validation |       | External validation |       |           |       |
|-----------------------|------------------|-------|--------------|-------|---------------------|-------|---------------------|-------|-----------|-------|
|                       |                  |       |              |       |                     |       | THZP                |       | FUZH      |       |
|                       | No.              | %     | No.          | %     | No.                 | %     | No.                 | %     | No.       | %     |
| Total no. of patients | 244              |       | 244          |       | 341                 |       | 94                  |       | 254       |       |
| Operation time        | 2006–2010        |       |              |       | 2001–2005           |       | 2006–2009           |       | 2004–2005 |       |
| Age, years            |                  |       |              |       |                     |       |                     |       |           |       |
| Median                | 49               |       | 52           |       | 49                  |       | 52                  |       | 52        |       |
| Range                 | 13–76            |       | 23–78        |       | 20–78               |       | 25–84               |       | 23–75     |       |
| Sex                   |                  |       |              |       |                     |       |                     |       |           |       |
| Male                  | 215              | 88.11 | 217          | 88.93 | 306                 | 89.74 | 78                  | 82.98 | 206       | 81.1  |
| Female                | 29               | 11.89 | 27           | 11.07 | 35                  | 10.26 | 16                  | 17.02 | 48        | 18.9  |
| Tumor encapsulation   |                  |       |              |       |                     |       |                     |       |           |       |
| Absent                | 134              | 54.92 | 140          | 57.38 | 189                 | 55.43 | 40                  | 42.55 | 142       | 55.91 |
| Present               | 105              | 43.03 | 100          | 40.98 | 152                 | 44.57 | 45                  | 47.87 | 112       | 44.09 |
| NA                    | 5                | 2.05  | 4            | 1.64  | —                   | —     | 9                   | 9.57  | —         | —     |
| Differentiation       |                  |       |              |       |                     |       |                     |       |           |       |
| I–II                  | 199              | 81.56 | 183          | 75.00 | 263                 | 77.13 | 67                  | 71.28 | 196       | 77.17 |
| III–IV                | 45               | 18.44 | 58           | 23.77 | 70                  | 20.53 | 27                  | 28.72 | 55        | 21.65 |
| NA                    | —                | —     | 3            | 1.23  | 8                   | 2.35  | —                   | —     | 3         | 1.18  |
| Tumor number          |                  |       |              |       |                     |       |                     |       |           |       |
| Single                | 174              | 71.31 | 187          | 76.64 | 249                 | 73.02 | 71                  | 75.53 | 216       | 85.04 |
| Multiple              | 70               | 28.69 | 57           | 23.36 | 92                  | 26.98 | 14                  | 14.89 | 38        | 14.96 |
| NA                    | —                | —     | —            | —     | —                   | —     | 9                   | 9.57  | —         | —     |
| Tumor size            |                  |       |              |       |                     |       |                     |       |           |       |
| ≤ 5 cm                | 108              | 44.26 | 120          | 49.18 | 118                 | 34.60 | 47                  | 50.00 | 144       | 56.69 |
| > 5 cm                | 136              | 55.74 | 124          | 50.82 | 223                 | 65.40 | 46                  | 48.94 | 110       | 43.31 |
| NA                    | —                | —     | —            | —     | —                   | —     | 1                   | 1.06  | —         | —     |
| Vascular invasion     |                  |       |              |       |                     |       |                     |       |           |       |
| Absent                | 214              | 87.70 | 218          | 89.34 | 291                 | 85.34 | 58                  | 61.70 | 164       | 64.57 |
| Present               | 30               | 12.30 | 26           | 10.66 | 50                  | 14.66 | 29                  | 30.85 | 90        | 35.43 |
| NA                    | —                | —     | —            | —     | —                   | —     | 7                   | 7.45  | —         | —     |
| BCLC stage            |                  |       |              |       |                     |       |                     |       |           |       |
| 0–A                   | 150              | 61.48 | 161          | 65.98 | 154                 | 45.16 | 54                  | 57.45 | 150       | 59.06 |
| B–C                   | 94               | 38.52 | 83           | 34.02 | 187                 | 54.84 | 31                  | 32.98 | 104       | 40.94 |
| NA                    | —                | —     | —            | —     | —                   | —     | 9                   | 9.57  | —         | —     |
| TNM stage             |                  |       |              |       |                     |       |                     |       |           |       |
| I–II                  | 166              | 68.03 | 181          | 74.18 | 188                 | 55.13 | 86                  | 91.49 | 208       | 81.89 |
| III–IV                | 78               | 31.97 | 63           | 25.82 | 153                 | 44.87 | 8                   | 8.51  | 46        | 18.11 |

**Supplemental Table 2 (continued).** Clinicopathological Characteristics of the HCC Patients in Each Cohort

| Characteristics        | Primary training |       | Primary test |       | Internal validation |       | External validation |        |      |       |
|------------------------|------------------|-------|--------------|-------|---------------------|-------|---------------------|--------|------|-------|
|                        |                  |       |              |       |                     |       | THZP                |        | FUZH |       |
|                        | No.              | %     | No.          | %     | No.                 | %     | No.                 | %      | No.  | %     |
| Cirrhosis              |                  |       |              |       |                     |       |                     |        |      |       |
| Absent                 | 48               | 19.67 | 45           | 18.44 | 66                  | 19.35 | 12                  | 12.77  | 39   | 15.35 |
| Present                | 193              | 79.10 | 194          | 79.51 | 275                 | 80.65 | 77                  | 81.91  | 215  | 84.65 |
| NA                     | 3                | 1.23  | 5            | 2.05  | —                   | —     | 5                   | 5.32   | —    | —     |
| ALBI grade             |                  |       |              |       |                     |       |                     |        |      |       |
| 1                      | 144              | 59.02 | 165          | 67.62 | 225                 | 65.98 | 54                  | 57.45  | 176  | 69.29 |
| 2                      | 100              | 40.98 | 78           | 31.97 | 113                 | 33.14 | 31                  | 32.98  | 78   | 30.71 |
| NA                     | —                | —     | 1            | 0.41  | 3                   | 0.88  | 9                   | 9.57   | —    | —     |
| Child-Pugh             |                  |       |              |       |                     |       |                     |        |      |       |
| A                      | 237              | 97.13 | 231          | 94.67 | 310                 | 90.91 | —                   | —      | 239  | 94.09 |
| B                      | 7                | 2.87  | 11           | 4.51  | 28                  | 8.21  | —                   | —      | 15   | 5.91  |
| NA                     | —                | —     | 2            | 0.82  | 3                   | 0.88  | 94                  | 100.00 | —    | —     |
| AFP                    |                  |       |              |       |                     |       |                     |        |      |       |
| ≤ 25 ng/mL             | 95               | 38.93 | 84           | 34.43 | 100                 | 29.33 | 26                  | 27.66  | 90   | 35.43 |
| > 25 ng/mL             | 149              | 61.07 | 160          | 65.57 | 241                 | 70.67 | 59                  | 62.77  | 164  | 64.57 |
| NA                     | —                | —     | —            | —     | —                   | —     | 9                   | 9.57   | —    | —     |
| ALT (U/L)              |                  |       |              |       |                     |       |                     |        |      |       |
| ≤ 40 U/L               | 135              | 55.33 | 142          | 58.20 | 166                 | 48.68 | 41                  | 43.62  | 133  | 52.36 |
| > 40 U/L               | 109              | 44.67 | 102          | 41.80 | 175                 | 51.32 | 44                  | 46.81  | 121  | 47.64 |
| NA                     | —                | —     | —            | —     | —                   | —     | 9                   | 9.57   | —    | —     |
| HBsAg                  |                  |       |              |       |                     |       |                     |        |      |       |
| Positive               | 220              | 90.16 | 217          | 88.93 | 294                 | 86.22 | 72                  | 76.60  | 210  | 82.68 |
| Negative               | 24               | 9.84  | 27           | 11.07 | 47                  | 13.78 | 13                  | 13.83  | 42   | 16.54 |
| NA                     | —                | —     | —            | —     | —                   | —     | 9                   | 9.57   | 2    | 0.79  |
| HCVAb                  |                  |       |              |       |                     |       |                     |        |      |       |
| Positive               | 1                | 0.41  | 4            | 1.64  | 5                   | 1.47  | 1                   | 1.06   | 3    | 1.18  |
| Negative               | 243              | 99.59 | 240          | 98.36 | 336                 | 98.53 | 82                  | 87.23  | 248  | 97.64 |
| NA                     | —                | —     | —            | —     | —                   | —     | 11                  | 11.70  | 3    | 1.18  |
| Follow-up (survival)   |                  |       |              |       |                     |       |                     |        |      |       |
| Median (months)        | 59.35            |       | 55.48        |       | 36.3                |       | 48.47               |        |      |       |
| Range (months)         | 1–96             |       | 1.93–96      |       | 0.43–96             |       | 0.5–96              |        |      |       |
| Events (no.)           | 111              |       | 114          |       | 205                 |       | 209                 |        |      |       |
| Events (%)             | 45.49            |       | 46.72        |       | 60.12               |       | 60.06               |        |      |       |
| Follow-up (recurrence) |                  |       |              |       |                     |       |                     |        |      |       |
| Median (months)        | 15.27            |       | 11.48        |       | 11.97               |       | 26.27               |        |      |       |
| Range (months)         | 0.87–96          |       | 1–96         |       | 0.4–96              |       | 0.5–96              |        |      |       |
| Event (no.)            | 127              |       | 136          |       | 205                 |       | 239                 |        |      |       |
| Event (%)              | 52.05            |       | 55.74        |       | 60.12               |       | 68.68               |        |      |       |

Abbreviations: ALBI grade, albumin–bilirubin grade; AFP, alpha-fetoprotein; ALT, alanine aminotransferase; BCLC stage, Barcelona Clinic Liver Cancer stage; FUZH, Fudan University Zhongshan Hospital; HBsAg, hepatitis B surface antigen; HCVAb, Hepatitis C virus antibody; NA, not available; THZP, Taizhou Hospital of Zhejiang Province.

**Supplemental Table 3.** Clinicopathological Characteristics of the Patients in the Primary Cohort

| Characteristics           | Primary-training |       | Primary-test |       | P*                 |
|---------------------------|------------------|-------|--------------|-------|--------------------|
|                           | No.              | %     | No.          | %     |                    |
| Age, years                |                  |       |              |       | 0.071 <sup>†</sup> |
| Median                    |                  | 49    |              | 52    |                    |
| Range                     |                  | 13–76 |              | 23–78 |                    |
| Sex                       |                  |       |              |       | 0.776              |
| Male                      | 215              | 88.11 | 217          | 88.93 |                    |
| Female                    | 29               | 11.89 | 27           | 11.07 |                    |
| Tumor encapsulation       |                  |       |              |       | 0.616              |
| Absent                    | 134              | 56.07 | 140          | 58.33 |                    |
| Present                   | 105              | 43.93 | 100          | 41.67 |                    |
| NA                        | 5                | —     | 4            | —     |                    |
| Differentiation           |                  |       |              |       | 0.130              |
| I–II                      | 199              | 81.56 | 183          | 75.93 |                    |
| III–IV                    | 45               | 18.44 | 58           | 24.07 |                    |
| NA                        | —                | —     | 3            | —     |                    |
| Tumor number              |                  |       |              |       | 0.180              |
| Single                    | 174              | 71.31 | 187          | 76.64 |                    |
| Multiple                  | 70               | 28.69 | 57           | 23.36 |                    |
| Tumor size                |                  |       |              |       | 0.276              |
| ≤ 5 cm                    | 108              | 44.26 | 120          | 49.18 |                    |
| > 5 cm                    | 136              | 55.74 | 124          | 50.82 |                    |
| Vascular invasion         |                  |       |              |       | 0.570              |
| Absent                    | 214              | 87.70 | 218          | 89.34 |                    |
| Present                   | 30               | 12.30 | 26           | 10.66 |                    |
| BCLC stage classification |                  |       |              |       | 0.300              |
| 0–A                       | 150              | 61.48 | 161          | 65.98 |                    |
| B–C                       | 94               | 38.52 | 83           | 34.02 |                    |
| TNM stage                 |                  |       |              |       | 0.134              |
| I–II                      | 166              | 68.03 | 181          | 74.18 |                    |
| III–IV                    | 78               | 31.97 | 63           | 25.82 |                    |
| Cirrhosis                 |                  |       |              |       | 0.763              |
| Absent                    | 48               | 19.67 | 45           | 18.44 |                    |
| Present                   | 193              | 79.10 | 194          | 79.51 |                    |
| NA                        | 3                | 1.23  | 5            | 2.05  |                    |
| ALBI grade                |                  |       |              |       | 0.042              |
| 1                         | 144              | 59.02 | 165          | 67.90 |                    |
| 2                         | 100              | 40.98 | 78           | 32.10 |                    |
| NA                        | —                | —     | 1            | —     |                    |
| Child-Pugh                |                  |       |              |       | 0.326              |
| A                         | 237              | 97.13 | 231          | 95.45 |                    |
| B                         | 7                | 2.87  | 11           | 4.55  |                    |
| NA                        | —                | —     | 2            | —     |                    |

**Supplemental Table 3 (continued).** Clinicopathological Characteristics of the Patients in the Primary Cohort

| Characteristics | Primary-training |       | Primary-test |       | P*                  |
|-----------------|------------------|-------|--------------|-------|---------------------|
|                 | No.              | %     | No.          | %     |                     |
| AFP             |                  |       |              |       | 0.301               |
| ≤ 25 ng/mL      | 95               | 38.93 | 84           | 34.43 |                     |
| > 25 ng/mL      | 149              | 61.07 | 160          | 65.57 |                     |
| ALT             |                  |       |              |       | 0.522               |
| ≤ 40 U/L        | 135              | 55.33 | 142          | 58.20 |                     |
| > 40 U/L        | 109              | 44.67 | 102          | 41.80 |                     |
| HBsAg           |                  |       |              |       | 0.657               |
| Positive        | 220              | 90.16 | 217          | 88.93 |                     |
| Negative        | 24               | 9.84  | 27           | 11.07 |                     |
| HCVAb           |                  |       |              |       | 0.372 <sup>††</sup> |
| Positive        | 1                | 0.41  | 4            | 1.64  |                     |
| Negative        | 243              | 99.59 | 240          | 98.36 |                     |

\*Calculated by Chi-Square test, unless otherwise indicated; <sup>†</sup>calculated by Mann-Whitney U test; <sup>††</sup>calculated by Fisher's exact test.

Abbreviations: ALBI grade, albumin–bilirubin grade; AFP, alpha-fetoprotein; ALT, alanine aminotransferase; BCLC stage classification, Barcelona Clinic Liver Cancer stage; HBsAg, hepatitis B surface antigen; HCVAb, Hepatitis C virus antibody; NA, not available.

**Supplemental Table 4.** Correlation Between the Clinicopathological Characteristics and MRS Grouping in the Primary Cohort

| Characteristics           | Primary training cohort             |       |                                     |       |                                      |       | <i>P</i> *            | Primary test cohort                 |       |                                     |       |                                      |       | <i>P</i> *         |
|---------------------------|-------------------------------------|-------|-------------------------------------|-------|--------------------------------------|-------|-----------------------|-------------------------------------|-------|-------------------------------------|-------|--------------------------------------|-------|--------------------|
|                           | MRS <sup>low</sup> ( <i>n</i> = 95) |       | MRS <sup>int</sup> ( <i>n</i> = 92) |       | MRS <sup>high</sup> ( <i>n</i> = 57) |       |                       | MRS <sup>low</sup> ( <i>n</i> = 96) |       | MRS <sup>int</sup> ( <i>n</i> = 90) |       | MRS <sup>high</sup> ( <i>n</i> = 58) |       |                    |
|                           | No.                                 | %     | No.                                 | %     | No.                                  | %     |                       | No.                                 | %     | No.                                 | %     | No.                                  | %     |                    |
| Age, years                |                                     |       |                                     |       |                                      |       | 0.912 <sup>†</sup>    |                                     |       |                                     |       |                                      |       | 0.001 <sup>†</sup> |
| Median                    | 48                                  |       | 48                                  |       | 47                                   |       |                       | 55                                  |       | 47                                  |       | 51                                   |       |                    |
| Range                     | 20–76                               |       | 13–74                               |       | 24–73                                |       |                       | 31–78                               |       | 23–74                               |       | 23–71                                |       |                    |
| Sex                       |                                     |       |                                     |       |                                      |       | 0.182                 |                                     |       |                                     |       |                                      |       | 0.525              |
| Male                      | 83                                  | 87.37 | 78                                  | 84.78 | 54                                   | 94.74 |                       | 88                                  | 91.67 | 79                                  | 87.78 | 50                                   | 86.21 |                    |
| Female                    | 12                                  | 12.63 | 14                                  | 15.22 | 3                                    | 5.26  |                       | 8                                   | 8.33  | 11                                  | 12.22 | 8                                    | 13.79 |                    |
| Tumor encapsulation       |                                     |       |                                     |       |                                      |       | 0.035                 |                                     |       |                                     |       |                                      |       | 0.327              |
| Absent                    | 53                                  | 56.99 | 43                                  | 47.25 | 38                                   | 69.09 |                       | 54                                  | 56.84 | 48                                  | 54.55 | 38                                   | 66.67 |                    |
| Present                   | 40                                  | 43.01 | 48                                  | 52.75 | 17                                   | 30.91 |                       | 41                                  | 43.16 | 40                                  | 45.45 | 19                                   | 33.33 |                    |
| NA                        | 2                                   | —     | 1                                   | —     | 2                                    | —     |                       | 1                                   | —     | 2                                   | —     | 1                                    | —     |                    |
| Differentiation           |                                     |       |                                     |       |                                      |       | 0.021                 |                                     |       |                                     |       |                                      |       | 0.155              |
| I–II                      | 85                                  | 89.47 | 73                                  | 79.35 | 41                                   | 71.93 |                       | 71                                  | 76.34 | 73                                  | 81.11 | 39                                   | 67.24 |                    |
| III–IV                    | 10                                  | 10.53 | 19                                  | 20.65 | 16                                   | 28.07 |                       | 22                                  | 23.66 | 17                                  | 18.89 | 19                                   | 32.76 |                    |
| NA                        | —                                   | —     | —                                   | —     | —                                    | —     |                       | 3                                   | —     | —                                   | —     | —                                    | —     |                    |
| Tumor number              |                                     |       |                                     |       |                                      |       | 0.185                 |                                     |       |                                     |       |                                      |       | 0.065              |
| Single                    | 74                                  | 77.89 | 61                                  | 66.30 | 39                                   | 68.42 |                       | 80                                  | 83.33 | 62                                  | 68.89 | 45                                   | 77.59 |                    |
| Multiple                  | 21                                  | 22.11 | 31                                  | 33.70 | 18                                   | 31.58 |                       | 16                                  | 16.67 | 28                                  | 31.11 | 13                                   | 22.41 |                    |
| Tumor size                |                                     |       |                                     |       |                                      |       | 0.016                 |                                     |       |                                     |       |                                      |       | 0.742              |
| ≤ 5 cm                    | 50                                  | 52.63 | 30                                  | 32.61 | 28                                   | 49.12 |                       | 49                                  | 51.04 | 45                                  | 50.00 | 26                                   | 44.83 |                    |
| > 5 cm                    | 45                                  | 47.37 | 62                                  | 67.39 | 29                                   | 50.88 |                       | 47                                  | 48.96 | 45                                  | 50.00 | 32                                   | 55.17 |                    |
| Vascular invasion         |                                     |       |                                     |       |                                      |       | < 0.001 <sup>††</sup> |                                     |       |                                     |       |                                      |       | 0.015              |
| Absent                    | 91                                  | 95.79 | 81                                  | 88.04 | 42                                   | 73.68 |                       | 90                                  | 93.75 | 82                                  | 91.11 | 46                                   | 79.31 |                    |
| Present                   | 4                                   | 4.21  | 11                                  | 11.96 | 15                                   | 26.32 |                       | 6                                   | 6.25  | 8                                   | 8.89  | 12                                   | 20.69 |                    |
| BCLC stage classification |                                     |       |                                     |       |                                      |       | 0.018                 |                                     |       |                                     |       |                                      |       | 0.008              |
| 0–A                       | 68                                  | 71.58 | 54                                  | 58.70 | 28                                   | 49.12 |                       | 73                                  | 76.04 | 58                                  | 64.44 | 30                                   | 51.72 |                    |
| B–C                       | 27                                  | 28.42 | 38                                  | 41.30 | 29                                   | 50.88 |                       | 23                                  | 23.96 | 32                                  | 35.56 | 28                                   | 48.28 |                    |
| TNM stage                 |                                     |       |                                     |       |                                      |       | 0.016                 |                                     |       |                                     |       |                                      |       | 0.002              |
| I–II                      | 74                                  | 77.89 | 60                                  | 65.22 | 32                                   | 56.14 |                       | 78                                  | 81.25 | 70                                  | 77.78 | 33                                   | 56.90 |                    |
| III–IV                    | 21                                  | 22.11 | 32                                  | 34.78 | 25                                   | 43.86 |                       | 18                                  | 18.75 | 20                                  | 22.22 | 25                                   | 43.10 |                    |

**Supplemental Table 4 (continued).** Correlation Between the Clinicopathological Characteristics and the MRS Grouping in the Primary Cohort

| Characteristics | Primary training cohort             |       |                                     |        |                                      |        | <i>P</i> *          | Primary test cohort                 |        |                                     |       |                                      |       | <i>P</i> *          |
|-----------------|-------------------------------------|-------|-------------------------------------|--------|--------------------------------------|--------|---------------------|-------------------------------------|--------|-------------------------------------|-------|--------------------------------------|-------|---------------------|
|                 | MRS <sup>low</sup> ( <i>n</i> = 95) |       | MRS <sup>int</sup> ( <i>n</i> = 92) |        | MRS <sup>high</sup> ( <i>n</i> = 57) |        |                     | MRS <sup>low</sup> ( <i>n</i> = 96) |        | MRS <sup>int</sup> ( <i>n</i> = 90) |       | MRS <sup>high</sup> ( <i>n</i> = 58) |       |                     |
|                 | No.                                 | %     | No.                                 | %      | No.                                  | %      |                     | No.                                 | %      | No.                                 | %     | No.                                  | %     |                     |
| Cirrhosis       |                                     |       |                                     |        |                                      |        | 0.475               |                                     |        |                                     |       |                                      |       | 0.441               |
| Absent          | 20                                  | 21.05 | 20                                  | 22.22  | 8                                    | 14.29  |                     | 17                                  | 18.48  | 14                                  | 15.73 | 14                                   | 24.14 |                     |
| Present         | 75                                  | 78.95 | 70                                  | 77.78  | 48                                   | 85.71  |                     | 75                                  | 81.52  | 75                                  | 84.27 | 44                                   | 75.86 |                     |
| NA              | —                                   | —     | 2                                   | —      | 1                                    | —      |                     | 4                                   | —      | 1                                   | —     | —                                    | —     |                     |
| ALBI grade      |                                     |       |                                     |        |                                      |        | 0.815               |                                     |        |                                     |       |                                      |       | 0.146               |
| 1               | 58                                  | 61.05 | 52                                  | 56.52  | 34                                   | 59.65  |                     | 61                                  | 63.54  | 68                                  | 75.56 | 36                                   | 63.16 |                     |
| 2               | 37                                  | 38.95 | 40                                  | 43.48  | 23                                   | 40.35  |                     | 35                                  | 36.46  | 22                                  | 24.44 | 21                                   | 36.84 |                     |
| NA              | —                                   | —     | —                                   | —      | —                                    | —      |                     | —                                   | —      | —                                   | —     | —                                    | —     |                     |
| Child-Pugh      |                                     |       |                                     |        |                                      |        | 0.084 <sup>††</sup> |                                     |        |                                     |       |                                      |       | 0.538 <sup>††</sup> |
| A               | 91                                  | 95.79 | 92                                  | 100.00 | 54                                   | 94.74  |                     | 92                                  | 96.84  | 86                                  | 95.56 | 53                                   | 92.98 |                     |
| B               | 4                                   | 4.21  | 0                                   | 0.00   | 3                                    | 5.26   |                     | 3                                   | 3.16   | 4                                   | 4.44  | 4                                    | 7.02  |                     |
| NA              | —                                   | —     | —                                   | —      | —                                    | —      |                     | 1                                   | —      | —                                   | —     | 1                                    | —     |                     |
| AFP             |                                     |       |                                     |        |                                      |        | 0.007               |                                     |        |                                     |       |                                      |       | 0.090               |
| ≤ 25 ng/mL      | 48                                  | 50.53 | 26                                  | 28.26  | 21                                   | 36.84  |                     | 41                                  | 42.71  | 26                                  | 28.89 | 17                                   | 29.31 |                     |
| > 25 ng/mL      | 47                                  | 49.47 | 66                                  | 71.74  | 36                                   | 63.16  |                     | 55                                  | 57.29  | 64                                  | 71.11 | 41                                   | 70.69 |                     |
| ALT (U/L)       |                                     |       |                                     |        |                                      |        | 0.316               |                                     |        |                                     |       |                                      |       | 0.239               |
| ≤ 40 U/L        | 58                                  | 61.05 | 49                                  | 53.26  | 28                                   | 49.12  |                     | 62                                  | 64.58  | 50                                  | 55.56 | 30                                   | 51.72 |                     |
| > 40 U/L        | 37                                  | 38.95 | 43                                  | 46.74  | 29                                   | 50.88  |                     | 34                                  | 35.42  | 40                                  | 44.44 | 28                                   | 48.28 |                     |
| HBsAg           |                                     |       |                                     |        |                                      |        | 0.397               |                                     |        |                                     |       |                                      |       | 0.707               |
| Positive        | 84                                  | 88.42 | 86                                  | 93.48  | 50                                   | 87.72  |                     | 84                                  | 87.50  | 82                                  | 91.11 | 51                                   | 87.93 |                     |
| Negative        | 11                                  | 11.58 | 6                                   | 6.52   | 7                                    | 12.28  |                     | 12                                  | 12.50  | 8                                   | 8.89  | 7                                    | 12.07 |                     |
| HCVAb           |                                     |       |                                     |        |                                      |        | 1.000 <sup>††</sup> |                                     |        |                                     |       |                                      |       | 0.040 <sup>††</sup> |
| Positive        | 1                                   | 1.05  | 0                                   | 0.00   | 0                                    | 0.00   |                     | 0                                   | 0.00   | 1                                   | 1.11  | 3                                    | 5.17  |                     |
| Negative        | 94                                  | 98.95 | 92                                  | 100.00 | 57                                   | 100.00 |                     | 96                                  | 100.00 | 89                                  | 98.89 | 55                                   | 94.83 |                     |

\*Calculated by Chi-Square test, unless otherwise indicated; †calculated by Kruskal-Wallis test; ††calculated by Fisher's exact test.

Abbreviations: AFP, alpha-fetoprotein; ALBI grade, albumin–bilirubin grade; ALT, alanine aminotransferase; BCLC stage, Barcelona Clinic Liver Cancer stage; HBsAg, hepatitis B surface antigen; HCVAb, Hepatitis C virus antibody; NA, not applicable.

**Supplemental Table 5. Correlation Between the Clinicopathological Characteristics and MRS Grouping in the Internal and External Validation Cohorts**

| Characteristics   | Internal Validation Cohort           |       |                                      |       |                                      |       | <i>P</i> *         | Combined External Validation Cohort  |       |                                      |       |                                      |       | <i>P</i> *         |
|-------------------|--------------------------------------|-------|--------------------------------------|-------|--------------------------------------|-------|--------------------|--------------------------------------|-------|--------------------------------------|-------|--------------------------------------|-------|--------------------|
|                   | MRS <sup>low</sup> ( <i>n</i> = 155) |       | MRS <sup>int</sup> ( <i>n</i> = 114) |       | MRS <sup>high</sup> ( <i>n</i> = 72) |       |                    | MRS <sup>low</sup> ( <i>n</i> = 155) |       | MRS <sup>int</sup> ( <i>n</i> = 136) |       | MRS <sup>high</sup> ( <i>n</i> = 57) |       |                    |
|                   | No.                                  | %     | No.                                  | %     | No.                                  | %     |                    | No.                                  | %     | No.                                  | %     | No.                                  | %     |                    |
| Age, years        |                                      |       |                                      |       |                                      |       | 0.180 <sup>†</sup> |                                      |       |                                      |       |                                      |       | 0.822 <sup>†</sup> |
| Median            | 50                                   |       | 48                                   |       | 47                                   |       |                    | 53                                   |       | 53                                   |       | 52                                   |       |                    |
| Range             | 23–77                                |       | 20–78                                |       | 25–75                                |       |                    | 30–75                                |       | 23–84                                |       | 25–72                                |       |                    |
| Sex               |                                      |       |                                      |       |                                      |       | 0.823              |                                      |       |                                      |       |                                      |       | 0.607              |
| Male              | 138                                  | 89.03 | 101                                  | 89.38 | 66                                   | 91.67 |                    | 130                                  | 83.87 | 108                                  | 79.41 | 46                                   | 80.70 |                    |
| Female            | 17                                   | 10.97 | 12                                   | 10.62 | 6                                    | 8.33  |                    | 25                                   | 16.13 | 28                                   | 20.59 | 11                                   | 19.30 |                    |
| Capsule           |                                      |       |                                      |       |                                      |       | 0.035              |                                      |       |                                      |       |                                      |       | 0.228              |
| Absent            | 77                                   | 49.68 | 63                                   | 55.26 | 49                                   | 68.06 |                    | 91                                   | 58.71 | 68                                   | 50.00 | 23                                   | 47.92 |                    |
| Present           | 178                                  | 50.32 | 51                                   | 44.74 | 23                                   | 31.94 |                    | 64                                   | 41.29 | 68                                   | 50.00 | 25                                   | 52.08 |                    |
| Differentiation   |                                      |       |                                      |       |                                      |       | 0.064              |                                      |       |                                      |       |                                      |       | 0.001              |
| I–II              | 127                                  | 83.01 | 89                                   | 79.46 | 47                                   | 69.12 |                    | 129                                  | 84.31 | 100                                  | 74.07 | 34                                   | 59.65 |                    |
| III–IV            | 26                                   | 16.99 | 23                                   | 20.54 | 21                                   | 30.88 |                    | 24                                   | 15.69 | 35                                   | 25.93 | 23                                   | 40.35 |                    |
| NA                | 2                                    | —     | 2                                    | —     | 4                                    | —     |                    | 2                                    | —     | 1                                    | —     | —                                    | —     |                    |
| Tumor number      |                                      |       |                                      |       |                                      |       | 0.453              |                                      |       |                                      |       |                                      |       | 0.618              |
| Single            | 118                                  | 76.13 | 79                                   | 69.30 | 52                                   | 72.22 |                    | 134                                  | 86.45 | 112                                  | 82.35 | 41                                   | 85.42 |                    |
| Multiple          | 37                                   | 23.87 | 35                                   | 30.70 | 20                                   | 27.78 |                    | 21                                   | 13.55 | 24                                   | 17.65 | 7                                    | 14.58 |                    |
| NA                | —                                    | —     | —                                    | —     | —                                    | —     |                    | —                                    | —     | —                                    | —     | 9                                    | —     |                    |
| Tumor size        |                                      |       |                                      |       |                                      |       | 0.009              |                                      |       |                                      |       |                                      |       | 0.104              |
| ≤ 5 cm            | 67                                   | 43.23 | 32                                   | 28.07 | 19                                   | 26.39 |                    | 95                                   | 61.29 | 69                                   | 50.74 | 27                                   | 48.21 |                    |
| > 5 cm            | 88                                   | 56.77 | 82                                   | 71.93 | 53                                   | 73.61 |                    | 60                                   | 38.71 | 67                                   | 49.26 | 29                                   | 50.88 |                    |
| NA                | —                                    | —     | —                                    | —     | —                                    | —     |                    | —                                    | —     | —                                    | —     | 1                                    | —     |                    |
| Vascular invasion |                                      |       |                                      |       |                                      |       | < 0.001            |                                      |       |                                      |       |                                      |       | < 0.001            |
| Absent            | 143                                  | 92.26 | 98                                   | 85.96 | 50                                   | 69.44 |                    | 119                                  | 76.77 | 75                                   | 55.15 | 28                                   | 56.00 |                    |
| Present           | 12                                   | 7.74  | 16                                   | 14.04 | 22                                   | 30.56 |                    | 36                                   | 23.23 | 61                                   | 44.85 | 22                                   | 44.00 |                    |
| NA                | —                                    | —     | —                                    | —     | —                                    | —     |                    | —                                    | —     | —                                    | —     | 7                                    | —     |                    |

**Supplemental Table 5 (continued).** Correlation Between the Clinicopathological Characteristics and MRS Grouping in the Internal and External Validation Cohorts

| Characteristics           | Internal Validation Cohort           |       |                                      |       |                                      |       | <i>P</i> * | Combined External Validation Cohort  |       |                                      |       |                                      |       | <i>P</i> *          |
|---------------------------|--------------------------------------|-------|--------------------------------------|-------|--------------------------------------|-------|------------|--------------------------------------|-------|--------------------------------------|-------|--------------------------------------|-------|---------------------|
|                           | MRS <sup>low</sup> ( <i>n</i> = 155) |       | MRS <sup>int</sup> ( <i>n</i> = 114) |       | MRS <sup>high</sup> ( <i>n</i> = 72) |       |            | MRS <sup>low</sup> ( <i>n</i> = 155) |       | MRS <sup>int</sup> ( <i>n</i> = 136) |       | MRS <sup>high</sup> ( <i>n</i> = 57) |       |                     |
|                           | No.                                  | %     | No.                                  | %     | No.                                  | %     |            | No.                                  | %     | No.                                  | %     | No.                                  | %     |                     |
| BCLC stage classification |                                      |       |                                      |       |                                      |       | < 0.001    |                                      |       |                                      |       |                                      |       | < 0.001             |
| 0–A                       | 89                                   | 57.42 | 46                                   | 40.35 | 19                                   | 26.39 |            | 112                                  | 72.26 | 67                                   | 49.26 | 25                                   | 52.08 |                     |
| B–C                       | 66                                   | 42.58 | 68                                   | 59.65 | 53                                   | 73.61 |            | 43                                   | 27.74 | 69                                   | 50.74 | 23                                   | 47.92 |                     |
| NA                        | —                                    | —     | —                                    | —     | —                                    | —     |            | —                                    | —     | —                                    | —     | 9                                    | —     |                     |
| TNM stage                 |                                      |       |                                      |       |                                      |       | 0.001      |                                      |       |                                      |       |                                      |       | < 0.001             |
| I–II                      | 102                                  | 65.81 | 56                                   | 49.12 | 30                                   | 41.67 |            | 141                                  | 90.97 | 115                                  | 84.56 | 38                                   | 66.67 |                     |
| III–IV                    | 53                                   | 34.19 | 58                                   | 50.88 | 42                                   | 58.33 |            | 14                                   | 9.03  | 21                                   | 15.44 | 19                                   | 33.33 |                     |
| Cirrhosis                 |                                      |       |                                      |       |                                      |       | 0.854      |                                      |       |                                      |       |                                      |       | 0.288               |
| Absent                    | 28                                   | 18.06 | 23                                   | 20.18 | 15                                   | 20.83 |            | 19                                   | 12.26 | 21                                   | 15.44 | 11                                   | 21.15 |                     |
| Present                   | 127                                  | 81.94 | 91                                   | 79.82 | 57                                   | 79.17 |            | 136                                  | 87.74 | 115                                  | 84.56 | 41                                   | 78.85 |                     |
| NA                        | —                                    | —     | —                                    | —     | —                                    | —     |            | —                                    | —     | —                                    | —     | 5                                    | —     |                     |
| ALBI grade                |                                      |       |                                      |       |                                      |       | 0.892      |                                      |       |                                      |       |                                      |       | 0.011               |
| 1                         | 104                                  | 67.53 | 76                                   | 66.67 | 45                                   | 64.29 |            | 118                                  | 76.13 | 82                                   | 60.29 | 30                                   | 62.50 |                     |
| 2                         | 50                                   | 32.47 | 38                                   | 33.33 | 25                                   | 35.71 |            | 37                                   | 23.87 | 54                                   | 39.71 | 18                                   | 37.50 |                     |
| NA                        | 1                                    | —     | —                                    | —     | 2                                    | —     |            | —                                    | —     | —                                    | —     | 9                                    | —     |                     |
| Child-Pugh                |                                      |       |                                      |       |                                      |       | 0.955      |                                      |       |                                      |       |                                      |       | 0.230 <sup>††</sup> |
| A                         | 142                                  | 92.21 | 104                                  | 91.23 | 64                                   | 91.43 |            | 117                                  | 96.69 | 82                                   | 91.11 | 40                                   | 93.02 |                     |
| B                         | 12                                   | 7.79  | 10                                   | 8.77  | 6                                    | 8.57  |            | 4                                    | 3.31  | 8                                    | 8.89  | 3                                    | 6.98  |                     |
| NA                        | 1                                    | —     | —                                    | —     | 2                                    | —     |            | 34                                   | —     | 46                                   | —     | 14                                   | —     |                     |
| AFP                       |                                      |       |                                      |       |                                      |       | 0.001      |                                      |       |                                      |       |                                      |       | 0.294               |
| ≤ 25 ng/mL                | 59                                   | 38.06 | 19                                   | 16.67 | 22                                   | 30.56 |            | 59                                   | 38.06 | 40                                   | 29.41 | 17                                   | 35.42 |                     |
| > 25 ng/mL                | 96                                   | 61.94 | 95                                   | 83.33 | 50                                   | 69.44 |            | 96                                   | 61.94 | 96                                   | 70.59 | 31                                   | 64.58 |                     |
| NA                        | —                                    | —     | —                                    | —     | —                                    | —     |            | —                                    | —     | —                                    | —     | 9                                    | —     |                     |
| ALT                       |                                      |       |                                      |       |                                      |       | 0.315      |                                      |       |                                      |       |                                      |       | 0.564               |
| ≤ 40 U/L                  | 72                                   | 46.45 | 62                                   | 54.39 | 32                                   | 44.44 |            | 75                                   | 48.39 | 72                                   | 52.94 | 27                                   | 56.25 |                     |
| > 40 U/L                  | 83                                   | 53.55 | 52                                   | 45.61 | 40                                   | 55.56 |            | 80                                   | 51.61 | 64                                   | 47.06 | 21                                   | 43.75 |                     |
| NA                        | —                                    | —     | —                                    | —     | —                                    | —     |            | —                                    | —     | —                                    | —     | 9                                    | —     |                     |



**Supplemental Table 5 (continued).** Correlation Between the Clinicopathological Characteristics and MRS Grouping in the Internal and External Validation Cohorts

| Characteristics | Internal Validation Cohort           |       |                                      |       |                                      |        | <i>P</i> *          | Combined External Validation Cohort  |        |                                      |       |                                      |       | <i>P</i> *          |
|-----------------|--------------------------------------|-------|--------------------------------------|-------|--------------------------------------|--------|---------------------|--------------------------------------|--------|--------------------------------------|-------|--------------------------------------|-------|---------------------|
|                 | MRS <sup>low</sup> ( <i>n</i> = 155) |       | MRS <sup>int</sup> ( <i>n</i> = 114) |       | MRS <sup>high</sup> ( <i>n</i> = 72) |        |                     | MRS <sup>low</sup> ( <i>n</i> = 155) |        | MRS <sup>int</sup> ( <i>n</i> = 136) |       | MRS <sup>high</sup> ( <i>n</i> = 57) |       |                     |
|                 | No.                                  | %     | No.                                  | %     | No.                                  | %      |                     | No.                                  | %      | No.                                  | %     | No.                                  | %     |                     |
| HBsAg           |                                      |       |                                      |       |                                      |        | 0.127               |                                      |        |                                      |       |                                      |       | 0.026               |
| Positive        | 128                                  | 82.58 | 104                                  | 91.23 | 62                                   | 86.11  |                     | 138                                  | 89.61  | 107                                  | 78.68 | 37                                   | 78.72 |                     |
| Negative        | 27                                   | 17.42 | 10                                   | 8.77  | 10                                   | 13.89  |                     | 16                                   | 10.39  | 29                                   | 21.32 | 10                                   | 21.28 |                     |
| NA              | —                                    | —     | —                                    | —     | —                                    | —      |                     | 1                                    | —      | —                                    | —     | 10                                   | —     |                     |
| HCVAb           |                                      |       |                                      |       |                                      |        | 0.718 <sup>††</sup> |                                      |        |                                      |       |                                      |       | 0.029 <sup>††</sup> |
| Positive        | 3                                    | 1.94  | 2                                    | 1.75  | 0                                    | 0.00   |                     | 0                                    | 0.00   | 2                                    | 1.48  | 2                                    | 4.26  |                     |
| Negative        | 152                                  | 98.06 | 112                                  | 98.25 | 72                                   | 100.00 |                     | 152                                  | 100.00 | 133                                  | 98.52 | 45                                   | 95.74 |                     |
| NA              | —                                    | —     | —                                    | —     | —                                    | —      |                     | 3                                    | —      | 1                                    | —     | 10                                   | —     |                     |

\*Calculated by Chi-Square test, unless otherwise indicated; <sup>†</sup>calculated by Kruskal-Wallis test; <sup>††</sup>calculated by Fisher's exact test.

Abbreviations: AFP, alpha-fetoprotein; ALBI grade, albumin–bilirubin grade; ALT, alanine aminotransferase; BCLC stage, Barcelona Clinic Liver Cancer stage; HBsAg, hepatitis B surface antigen; HCVAb, Hepatitis C virus antibody; NA, not applicable.

**Supplemental Table 6.** Univariate Analyses of Clinicopathological Characteristics Associated with the TTR and OS in the Primary Training Cohort

| Characteristics                         | TTR  |            |          | OS   |            |          |
|-----------------------------------------|------|------------|----------|------|------------|----------|
|                                         | HR   | 95% CI     | <i>P</i> | HR   | 95% CI     | <i>P</i> |
| Age, years (> 49 vs ≤ 49)               | 1.00 | 0.71–1.42  | 0.991    | 1.04 | 0.72–1.51  | 0.847    |
| Sex (male vs female)                    | 0.73 | 0.45–1.21  | 0.224    | 0.88 | 0.52–1.50  | 0.646    |
| Tumor encapsulation (present vs absent) | 1.30 | 0.91–1.84  | 0.150    | 0.79 | 0.54–1.16  | 0.231    |
| Differentiation (III–IV vs I–II)        | 1.33 | 0.85–2.08  | 0.206    | 1.44 | 0.92–2.27  | 0.112    |
| Tumor number (multiple vs single)       | 1.68 | 1.15–2.47  | 0.008    | 2.01 | 1.37–2.95  | < 0.001  |
| Tumor size, cm (> 5 vs ≤ 5)             | 1.43 | 1.00–2.04  | 0.048    | 2.12 | 1.42–3.15  | < 0.001  |
| Vascular invasion (present vs absent)   | 3.37 | 2.08–5.46  | < 0.001  | 6.12 | 3.87–9.66  | < 0.001  |
| BCLC stage classification (B–C vs 0–A)  | 2.02 | 1.42–2.88  | < 0.001  | 3.09 | 2.12–4.50  | < 0.001  |
| TNM stage (III–IV vs I–II)              | 1.73 | 1.20–2.51  | 0.004    | 2.94 | 2.02–4.28  | < 0.001  |
| T stage (T3–T4 vs T1–T2)                | 1.79 | 1.24–2.60  | 0.002    | 2.83 | 1.94–4.12  | < 0.001  |
| N stage (N1 vs N0)                      | 0.05 | 0–1.1E25   | 0.923    | 5.40 | 0.74–39.25 | 0.096    |
| M stage (M1 vs M0)                      | 0.05 | 0–974.59   | 0.551    | 3.98 | 0.98–16.18 | 0.053    |
| Cirrhosis (present vs absent)           | 2.69 | 1.54–4.70  | < 0.001  | 2.97 | 1.55–5.70  | 0.001    |
| ALBI grade (2 vs 1)                     | 1.30 | 0.91–1.84  | 0.145    | 1.43 | 0.99–2.08  | 0.060    |
| Child-Pugh (B vs A)                     | 1.36 | 0.50–3.67  | 0.550    | 1.81 | 0.74–4.45  | 0.193    |
| AFP, ng/mL (> 25 vs ≤ 25)               | 1.45 | 1.01–2.09  | 0.046    | 1.79 | 1.20–2.69  | 0.005    |
| ALT, U/L (> 40 vs ≤ 40)                 | 1.09 | 0.77–1.54  | 0.642    | 1.41 | 0.97–2.05  | 0.071    |
| HBsAg (positive vs negative)            | 1.54 | 0.81–2.94  | 0.188    | 0.91 | 0.50–1.66  | 0.764    |
| HCVAb (positive vs negative)            | 1.89 | 0.26–13.55 | 0.528    | 2.29 | 0.32–16.43 | 0.411    |
| Myeloid Response Score                  | 1.02 | 1.02–1.03  | < 0.001  | 1.03 | 1.02–1.04  | < 0.001  |

Univariate analysis, Cox proportional hazards regression model.

Abbreviations: AFP, alpha-fetoprotein; ALBI grade, albumin–bilirubin grade; ALT, alanine aminotransferase; BCLC stage, Barcelona Clinic Liver Cancer stage; CI, confidence interval; HBsAg, hepatitis B surface antigen; HCVAb, Hepatitis C virus antibody; HR, hazard ratio; NA, not applicable; OS, overall survival; TTR, time to recurrence.

**Supplemental Table 7.** Univariate Analyses of Clinicopathological Characteristics Associated with the TTR and OS in the Primary Test Cohort

| Characteristics                         | TTR  |           |          | OS     |               |          |
|-----------------------------------------|------|-----------|----------|--------|---------------|----------|
|                                         | HR   | 95% CI    | <i>P</i> | HR     | 95% CI        | <i>P</i> |
| Age, years (> 49 vs ≤ 49)               | 0.95 | 0.68–1.34 | 0.780    | 0.86   | 0.59–1.24     | 0.411    |
| Sex (male vs female)                    | 0.91 | 0.53–1.56 | 0.733    | 0.64   | 0.34–1.06     | 0.083    |
| Tumor encapsulation (present vs absent) | 0.63 | 0.44–0.89 | 0.010    | 0.55   | 0.37–0.82     | 0.003    |
| Differentiation (III–IV vs I–II)        | 1.04 | 0.70–1.56 | 0.835    | 1.41   | 0.94–2.12     | 0.099    |
| Tumor number (multiple vs single)       | 2.08 | 1.42–3.05 | < 0.001  | 2.28   | 1.54–3.37     | < 0.001  |
| Tumor size, cm (> 5 vs ≤ 5)             | 1.41 | 1.00–1.98 | 0.047    | 1.40   | 0.97–2.03     | 0.072    |
| Vascular invasion (present vs absent)   | 3.14 | 1.82–5.45 | < 0.001  | 5.34   | 3.31–8.62     | < 0.001  |
| BCLC stage classification (B–C vs 0–A)  | 2.25 | 1.58–3.20 | < 0.001  | 2.95   | 2.04–4.27     | < 0.001  |
| TNM stage (III–IV vs I–II)              | 2.56 | 1.77–3.70 | < 0.001  | 3.38   | 2.32–4.94     | < 0.001  |
| T stage (T3–T4 vs T1–T2)                | 2.62 | 1.81–3.80 | < 0.001  | 3.19   | 2.18–4.68     | < 0.001  |
| N stage (N1 vs N0)                      | 2.35 | 0.86–6.41 | 0.096    | 4.13   | 1.67–10.20    | 0.002    |
| M stage (M1 vs M0)                      | NA   | NA        | NA       | 241.50 | 15.11–3860.98 | < 0.001  |
| Cirrhosis (present vs absent)           | 1.38 | 0.88–2.15 | 0.158    | 1.44   | 0.85–2.45     | 0.176    |
| ALBI grade (2 vs 1)                     | 0.85 | 0.59–1.23 | 0.401    | 1.06   | 0.72–1.57     | 0.768    |
| Child-Pugh (B vs A)                     | 1.95 | 0.99–3.85 | 0.054    | 2.85   | 1.44–5.65     | 0.003    |
| AFP, ng/mL (> 25 vs ≤ 25)               | 1.06 | 0.75–1.49 | 0.754    | 1.73   | 1.15–2.62     | 0.009    |
| ALT, U/L (> 40 vs ≤ 40)                 | 1.28 | 0.91–1.79 | 0.157    | 1.29   | 0.90–1.87     | 0.171    |
| HBsAg (positive vs negative)            | 1.20 | 0.67–2.12 | 0.542    | 1.08   | 0.60–1.97     | 0.791    |
| HCVAb (positive vs negative)            | 1.23 | 0.45–3.32 | 0.689    | 0.96   | 0.24–3.87     | 0.949    |
| Myeloid Response Score                  | 1.02 | 1.01–1.02 | < 0.001  | 1.03   | 1.02–1.03     | < 0.001  |

Univariate analysis, Cox proportional hazards regression model.

Abbreviations: AFP, alpha-fetoprotein; ALBI grade, albumin–bilirubin grade; ALT, alanine aminotransferase; BCLC stage, Barcelona Clinic Liver Cancer stage; CI, confidence interval; HBsAg, hepatitis B surface antigen; HCVAb, Hepatitis C virus antibody; HR, hazard ratio; NA, not applicable; OS, overall survival; TTR, time to recurrence.

**Supplemental Table 8.** Univariate Analyses of Clinicopathological Characteristics Associated with the TTR and OS in the Internal Validation Cohort

| Characteristics                         | TTR  |           |          | OS   |           |          |
|-----------------------------------------|------|-----------|----------|------|-----------|----------|
|                                         | HR   | 95% CI    | <i>P</i> | HR   | 95% CI    | <i>P</i> |
| Age, years (> 49 vs ≤ 49)               | 0.75 | 0.57–0.99 | 0.044    | 0.86 | 0.65–1.13 | 0.279    |
| Sex (male vs female)                    | 0.90 | 0.58–1.39 | 0.637    | 1.00 | 0.64–1.56 | 0.997    |
| Tumor encapsulation (present vs absent) | 0.54 | 0.40–0.71 | < 0.001  | 0.58 | 0.44–0.77 | < 0.001  |
| Differentiation (III–IV vs I–II)        | 1.50 | 1.08–2.09 | 0.016    | 1.71 | 1.24–2.36 | 0.001    |
| Tumor number (multiple vs single)       | 1.13 | 0.83–1.53 | 0.454    | 1.16 | 0.85–1.59 | 0.345    |
| Tumor size, cm (> 5 vs ≤ 5)             | 1.77 | 1.31–2.39 | < 0.001  | 1.65 | 1.22–2.23 | 0.001    |
| Vascular invasion (present vs absent)   | 3.39 | 2.32–4.95 | < 0.001  | 4.36 | 3.05–6.23 | < 0.001  |
| BCLC stage classification (B–C vs 0–A)  | 1.65 | 1.25–2.17 | < 0.001  | 1.81 | 1.37–2.39 | < 0.001  |
| TNM stage (III–IV vs I–II)              | 1.45 | 1.15–1.99 | 0.003    | 1.49 | 1.13–1.96 | 0.004    |
| T stage (T3–T4 vs T1–T2)                | 1.48 | 1.12–1.95 | 0.006    | 1.45 | 1.10–1.92 | 0.008    |
| N stage (N1 vs N0)                      | 1.09 | 0.68–1.75 | 0.682    | 1.38 | 0.91–2.10 | 0.130    |
| M stage (M1 vs M0)                      | 1.46 | 1.03–2.08 | 0.033    | 1.35 | 0.93–1.95 | 0.114    |
| Cirrhosis (present vs absent)           | 1.17 | 0.82–1.67 | 0.387    | 1.34 | 0.92–1.95 | 0.122    |
| ALBI grade (2 vs 1)                     | 0.82 | 0.61–1.11 | 0.207    | 0.92 | 0.69–1.24 | 0.596    |
| Child-Pugh (B vs A)                     | 1.06 | 0.64–1.77 | 0.816    | 1.23 | 0.77–1.98 | 0.383    |
| AFP, ng/mL (> 25 vs ≤ 25)               | 1.84 | 1.34–2.54 | < 0.001  | 1.69 | 1.23–2.33 | 0.001    |
| ALT, U/L (> 40 vs ≤ 40)                 | 1.06 | 0.80–1.39 | 0.699    | 1.00 | 0.76–1.31 | 0.987    |
| HBsAg (positive vs negative)            | 1.61 | 1.03–2.51 | 0.035    | 1.39 | 0.91–2.11 | 0.123    |
| HCVAb (positive vs negative)            | 0.69 | 0.17–2.79 | 0.605    | 1.18 | 0.38–3.68 | 0.781    |
| Myeloid Response Score                  | 1.02 | 1.01–1.02 | < 0.001  | 1.02 | 1.02–1.03 | < 0.001  |

Univariate analysis, Cox proportional hazards regression model.

Abbreviations: AFP, alpha-fetoprotein; ALBI grade, albumin–bilirubin grade; ALT, alanine aminotransferase; BCLC stage, Barcelona Clinic Liver Cancer stage; CI, confidence interval; HBsAg, hepatitis B surface antigen; HCVAb, Hepatitis C virus antibody; HR, hazard ratio; NA, not applicable; OS, overall survival; TTR, time to recurrence.

**Supplemental Table 9.** Univariate Analyses of Clinicopathological Characteristics Associated with the TTR and OS in the Combined External Validation Cohort

| Characteristics                         | TTR  |           |          | OS   |           |          |
|-----------------------------------------|------|-----------|----------|------|-----------|----------|
|                                         | HR   | 95% CI    | <i>P</i> | HR   | 95% CI    | <i>P</i> |
| Age, years (> 49 vs ≤ 49)               | 1.2  | 0.92–1.56 | 0.187    | 1.03 | 0.78–1.36 | 0.839    |
| Sex (male vs female)                    | 1.22 | 0.87–1.71 | 0.250    | 1.24 | 0.87–1.80 | 0.238    |
| Tumor encapsulation (present vs absent) | 1.13 | 0.87–1.47 | 0.355    | 1.30 | 0.98–1.71 | 0.065    |
| Differentiation (III–IV vs I–II)        | 1.44 | 1.08–1.92 | 0.014    | 1.44 | 1.06–1.97 | 0.020    |
| Tumor number (multiple vs single)       | 1.76 | 1.26–2.45 | 0.001    | 1.72 | 1.21–2.45 | 0.002    |
| Tumor size, cm (> 5 vs ≤ 5)             | 1.56 | 1.21–2.02 | 0.001    | 1.92 | 1.46–2.53 | < 0.001  |
| Vascular invasion (present vs absent)   | 2.14 | 1.64–2.79 | < 0.001  | 2.56 | 1.94–3.39 | < 0.001  |
| BCLC stage classification (B–C vs 0–A)  | 2.22 | 1.71–2.88 | < 0.001  | 2.82 | 2.13–3.73 | < 0.001  |
| TNM stage (III–IV vs I–II)              | 3.41 | 2.49–4.68 | < 0.001  | 4.73 | 3.41–6.55 | < 0.001  |
| T stage (T3–T4 vs T1–T2)                | 3.45 | 2.49–4.78 | < 0.001  | 4.77 | 3.40–6.67 | < 0.001  |
| N stage (N1 vs N0)                      | 2.24 | 0.83–6.03 | 0.11     | 2.9  | 1.08–7.79 | 0.035    |
| M stage (M1 vs M0)                      | NA   | NA        | NA       | NA   | NA        | NA       |
| Cirrhosis (present vs absent)           | 1.66 | 1.10–2.50 | 0.015    | 1.55 | 1.01–2.40 | 0.047    |
| ALBI grade (2 vs 1)                     | 1.31 | 1.00–1.72 | 0.049    | 1.22 | 0.91–1.63 | 0.182    |
| Child-Pugh (B vs A)                     | 1.31 | 0.73–2.36 | 0.361    | 1.62 | 0.88–2.99 | 0.125    |
| AFP, ng/mL (> 25 vs ≤ 25)               | 1.41 | 1.06–1.86 | 0.017    | 1.53 | 1.13–2.08 | 0.007    |
| ALT, U/L (> 40 vs ≤ 40)                 | 1.16 | 0.90–1.50 | 0.259    | 1.17 | 0.88–1.54 | 0.279    |
| HBsAg (positive vs negative)            | 1.06 | 0.74–1.51 | 0.768    | 0.91 | 0.50–1.66 | 0.764    |
| HCVAb (positive vs negative)            | 1.48 | 0.55–3.98 | 0.438    | 1.47 | 0.47–4.62 | 0.506    |
| Myeloid Response Score                  | 1.02 | 1.01–1.02 | < 0.001  | 1.02 | 1.02–1.03 | < 0.001  |

Univariate analysis, Cox proportional hazards regression model.

Abbreviations: AFP, alpha-fetoprotein; ALBI grade, albumin–bilirubin grade; ALT, alanine aminotransferase; BCLC stage, Barcelona Clinic Liver Cancer stage; CI, confidence interval; HBsAg, hepatitis B surface antigen; HCVAb, Hepatitis C virus antibody; HR, hazard ratio; NA, not applicable; OS, overall survival; TTR, time to recurrence.

**Supplemental Table 10.** Multivariate Analyses of Clinicopathological Characteristics Associated with the TTR and OS in Each Cohort

| Characteristics                         | Primary-training ( <i>n</i> = 244) |           |          | Primary-test ( <i>n</i> = 244) |           |          | Internal validation ( <i>n</i> = 341) |           |          | Combined External validation ( <i>n</i> = 348) |           |          |
|-----------------------------------------|------------------------------------|-----------|----------|--------------------------------|-----------|----------|---------------------------------------|-----------|----------|------------------------------------------------|-----------|----------|
|                                         | HR                                 | 95% CI    | <i>P</i> | HR                             | 95% CI    | <i>P</i> | HR                                    | 95% CI    | <i>P</i> | HR                                             | 95% CI    | <i>P</i> |
| <b>TTR</b>                              |                                    |           |          |                                |           |          |                                       |           |          |                                                |           |          |
| Age, years (> 49 vs ≤ 49)               | —                                  | —         | —        | —                              | —         | —        | —                                     | —         | —        | —                                              | —         | —        |
| Sex (male vs female)                    | —                                  | —         | —        | —                              | —         | —        | —                                     | —         | —        | —                                              | —         | —        |
| Tumor encapsulation (present vs absent) | —                                  | —         | —        | —                              | —         | —        | 0.67                                  | 0.50–0.91 | 0.011    | —                                              | —         | —        |
| Differentiation (III–IV vs I–II)        | —                                  | —         | —        | —                              | —         | —        | —                                     | —         | —        | —                                              | —         | —        |
| Tumor number (multiple vs single)       | —                                  | —         | —        | —                              | —         | —        | —                                     | —         | —        | —                                              | —         | —        |
| Tumor size, cm (> 5 vs ≤ 5)             | 1.58                               | 1.09–2.30 | 0.017    | 1.44                           | 1.01–2.07 | 0.108    | 1.46                                  | 1.06–2.00 | 0.021    | —                                              | —         | —        |
| Vascular invasion (present vs absent)   | 3.17                               | 1.90–5.31 | < 0.001  | 2.21                           | 1.21–4.03 | 0.010    | 2.31                                  | 1.52–3.51 | < 0.001  | 1.56                                           | 1.11–2.21 | 0.011    |
| BCLC stage classification (B–C vs 0–A)  | —                                  | —         | —        | —                              | —         | —        | —                                     | —         | —        | —                                              | —         | —        |
| TNM stage (III–IV vs I–II)              | —                                  | —         | —        | 2.24                           | 1.49–3.36 | < 0.001  | —                                     | —         | —        | 2.32                                           | 1.55–4.44 | 0.002    |
| Cirrhosis (present vs absent)           | 2.78                               | 1.59–4.89 | < 0.001  | 1.77                           | 1.11–2.83 | 0.017    | —                                     | —         | —        | 2.11                                           | 1.31–3.46 | < 0.001  |
| ALBI grade (2 vs 1)                     | —                                  | —         | —        | —                              | —         | —        | —                                     | —         | —        | —                                              | —         | —        |
| Child-Pugh (B vs A)                     | —                                  | —         | —        | —                              | —         | —        | —                                     | —         | —        | —                                              | —         | —        |
| AFP, ng/mL (> 25 vs ≤ 25)               | —                                  | —         | —        | —                              | —         | —        | 1.50                                  | 1.07–2.10 | 0.019    | —                                              | —         | —        |
| ALT, U/L (> 40 vs ≤ 40)                 | —                                  | —         | —        | —                              | —         | —        | —                                     | —         | —        | —                                              | —         | —        |
| HBsAg (positive vs negative)            | —                                  | —         | —        | —                              | —         | —        | —                                     | —         | —        | —                                              | —         | —        |
| HCVAb (positive vs negative)            | —                                  | —         | —        | —                              | —         | —        | —                                     | —         | —        | —                                              | —         | —        |
| Myeloid Response Score                  | 1.03                               | 1.02–1.03 | < 0.001  | 1.02                           | 1.01–1.03 | < 0.001  | 1.01                                  | 1.01–1.02 | < 0.001  | 1.02                                           | 1.01–1.03 | < 0.001  |

**Supplemental Table 10 (continued).** Multivariate Analyses of Clinicopathological Characteristics Associated with the TTR and OS in Each Cohort

| Characteristics                         | Primary-training ( <i>n</i> = 244) |           |          | Primary-test ( <i>n</i> = 244) |           |          | Internal validation ( <i>n</i> = 341) |           |          | Combined External validation ( <i>n</i> = 348) |           |          |
|-----------------------------------------|------------------------------------|-----------|----------|--------------------------------|-----------|----------|---------------------------------------|-----------|----------|------------------------------------------------|-----------|----------|
|                                         | HR                                 | 95% CI    | <i>P</i> | HR                             | 95% CI    | <i>P</i> | HR                                    | 95% CI    | <i>P</i> | HR                                             | 95% CI    | <i>P</i> |
| <b>OS</b>                               |                                    |           |          |                                |           |          |                                       |           |          |                                                |           |          |
| Age, years (> 49 vs ≤ 49)               | —                                  | —         | —        | —                              | —         | —        | —                                     | —         | —        | —                                              | —         | —        |
| Sex (male vs female)                    | —                                  | —         | —        | —                              | —         | —        | —                                     | —         | —        | —                                              | —         | —        |
| Tumor encapsulation (present vs absent) | —                                  | —         | —        | —                              | —         | —        | 0.74                                  | 0.55–1.01 | 0.054    | —                                              | —         | —        |
| Differentiation (III–IV vs I–II)        | —                                  | —         | —        | —                              | —         | —        | —                                     | —         | —        | —                                              | —         | —        |
| Tumor number (multiple vs single)       | —                                  | —         | —        | —                              | —         | —        | —                                     | —         | —        | —                                              | —         | —        |
| Tumor size, cm (> 5 vs ≤ 5)             | 2.38                               | 1.56–3.63 | < 0.001  | —                              | —         | —        | 1.47                                  | 1.06–2.02 | 0.021    | 1.51                                           | 1.05–2.17 | 0.027    |
| Vascular invasion (present vs absent)   | 4.18                               | 2.58–6.77 | < 0.001  | 3.64                           | 2.13–6.21 | < 0.001  | 3.41                                  | 2.28–5.09 | < 0.001  | 1.56                                           | 1.11–2.21 | 0.011    |
| BCLC stage classification (B–C vs 0–A)  | —                                  | —         | —        | —                              | —         | —        | —                                     | —         | —        | 1.75                                           | 1.16–2.63 | 0.007    |
| TNM stage (III–IV vs I–II)              | —                                  | —         | —        | 3.00                           | 1.96–4.59 | < 0.001  | —                                     | —         | —        | 2.61                                           | 1.60–4.25 | < 0.001  |
| Cirrhosis (present vs absent)           | 2.72                               | 1.41–5.24 | 0.003    | 1.95                           | 1.11–3.45 | 0.021    | 1.62                                  | 1.11–2.38 | 0.013    | 2.63                                           | 1.52–4.55 | 0.001    |
| ALBI grade (2 vs 1)                     | —                                  | —         | —        | —                              | —         | —        | —                                     | —         | —        | —                                              | —         | —        |
| Child-Pugh (B vs A)                     | —                                  | —         | —        | —                              | —         | —        | —                                     | —         | —        | 2.05                                           | 1.10–3.84 | 0.025    |
| AFP, ng/mL (> 25 vs ≤ 25)               | —                                  | —         | —        | 2.02                           | 1.30–3.14 | 0.002    | 1.44                                  | 1.03–2.03 | 0.033    | —                                              | —         | —        |
| ALT, U/L (> 40 vs ≤ 40)                 | —                                  | —         | —        | —                              | —         | —        | —                                     | —         | —        | —                                              | —         | —        |
| HBsAg (positive vs negative)            | —                                  | —         | —        | —                              | —         | —        | —                                     | —         | —        | —                                              | —         | —        |
| HCVAb (positive vs negative)            | —                                  | —         | —        | —                              | —         | —        | —                                     | —         | —        | —                                              | —         | —        |
| Myeloid Response Score                  | 1.03                               | 1.02–1.04 | < 0.001  | 1.02                           | 1.02–1.03 | < 0.001  | 1.02                                  | 1.02–1.03 | < 0.001  | 1.02                                           | 1.01–1.03 | < 0.001  |

The clinicopathological characteristics were put into a Cox proportional hazards regression model, the final equation was determined using the forward selection based on likelihood ratio test. HR, 95% CI and *P* values of the selected parameters in the final regression model are shown. “—” indicates that this parameter was not included in the final regression models.

Abbreviations: AFP, alpha-fetoprotein; BCLC stage, Barcelona Clinic Liver Cancer stage; CI, confidence interval; OS, overall survival; TTR, time to recurrence.

**Supplemental Table 13.** Characteristics of the Patients before Sorafenib Treatment

| Characteristics         | MRS <sup>low</sup> (n = 25) |        | MRS <sup>int</sup> (n = 13) |        | MRS <sup>high</sup> (n = 13) |        | P*                 |
|-------------------------|-----------------------------|--------|-----------------------------|--------|------------------------------|--------|--------------------|
|                         | No.                         | %      | No.                         | %      | No.                          | %      |                    |
| Age, years              |                             |        |                             |        |                              |        | 0.290 <sup>†</sup> |
| Median                  |                             | 53     |                             | 46     |                              | 53     |                    |
| Range                   |                             | 31–70  |                             | 29–63  |                              | 23–64  |                    |
| Sex                     |                             |        |                             |        |                              |        | 0.464              |
| Male                    | 24                          | 96.00  | 11                          | 84.62  | 12                           | 92.31  |                    |
| Female                  | 1                           | 4.00   | 2                           | 15.38  | 1                            | 7.69   |                    |
| Intrahepatic recurrence |                             |        |                             |        |                              |        | 0.837              |
| Positive                | 21                          | 84.00  | 10                          | 76.92  | 11                           | 84.62  |                    |
| Negative                | 4                           | 16.00  | 3                           | 23.08  | 2                            | 15.38  |                    |
| Extrahepatic spread     |                             |        |                             |        |                              |        | 0.720              |
| Positive                | 15                          | 60.00  | 7                           | 53.85  | 9                            | 69.23  |                    |
| Negative                | 10                          | 40.00  | 6                           | 46.15  | 4                            | 30.77  |                    |
| Macrovascular invasion  |                             |        |                             |        |                              |        | 0.501              |
| Absent                  | 21                          | 84.00  | 9                           | 69.23  | 11                           | 84.62  |                    |
| Present                 | 4                           | 16.00  | 4                           | 30.77  | 2                            | 15.38  |                    |
| Cirrhosis               |                             |        |                             |        |                              |        | 0.455              |
| Absent                  | 6                           | 24.00  | 3                           | 23.08  | 1                            | 7.69   |                    |
| Present                 | 19                          | 76.00  | 10                          | 76.92  | 12                           | 92.31  |                    |
| AFP                     |                             |        |                             |        |                              |        | 0.189              |
| ≤ 25 ng/mL              | 13                          | 56.52  | 3                           | 27.27  | 8                            | 61.54  |                    |
| > 25 ng/mL              | 10                          | 43.48  | 8                           | 72.73  | 5                            | 38.46  |                    |
| NA                      | 2                           | —      | 2                           | —      | —                            | —      |                    |
| ALT                     |                             |        |                             |        |                              |        | 0.309              |
| ≤ 40 U/L                | 7                           | 31.82  | 7                           | 53.85  | 7                            | 53.85  |                    |
| > 40 U/L                | 15                          | 68.18  | 6                           | 46.15  | 6                            | 46.15  |                    |
| NA                      | 3                           | —      | —                           | —      | —                            | —      |                    |
| HBsAg                   |                             |        |                             |        |                              |        | 0.629              |
| Positive                | 22                          | 95.65  | 12                          | 100.00 | 12                           | 92.31  |                    |
| Negative                | 1                           | 4.35   | 0                           | 0.00   | 1                            | 7.69   |                    |
| NA                      | 2                           | —      | 1                           | —      | —                            | —      |                    |
| HCVAb                   |                             |        |                             |        |                              |        | NA                 |
| Positive                | 0                           | 0.00   | 0                           | 0.00   | 0                            | 0.00   |                    |
| Negative                | 23                          | 100.00 | 12                          | 100.00 | 13                           | 100.00 |                    |
| NA                      | 2                           | —      | 1                           | —      | —                            | —      |                    |

\*Calculated by Chi-Square test, unless otherwise indicated; <sup>†</sup>calculated by Kruskal-Wallis test.

Abbreviations: AFP, alpha-fetoprotein; ALBI grade, albumin–bilirubin grade; ALT, alanine aminotransferase; BCLC stage, Barcelona Clinic Liver Cancer stage; HBsAg, hepatitis B surface antigen; HCVAb, Hepatitis C virus antibody; NA, not applicable.



**Supplemental Table 14.** The Correlation Between the MRS and the Immune Class in 21 HCC Samples with Gene Expression Profiles

| No. (% of row) | Rest    | Immune class | Total | <i>P</i> ( $\chi^2$ test) |
|----------------|---------|--------------|-------|---------------------------|
| MRS low        | 8 (80%) | 2 (20%)      | 10    | 0.0157                    |
| MRS high       | 3 (27%) | 8 (73%)      | 11    |                           |
| Total          | 11      | 10           | 21    |                           |

**Supplemental Table 15.** The Correlation Between the Myeloid Response State and the Immune Class in HCC Samples from the TCGA-LIHC Dataset

| No. (% of row)           | Rest     | Immune class | Total | <i>P</i>                                  |
|--------------------------|----------|--------------|-------|-------------------------------------------|
| Myeloid response state 1 | 87 (97%) | 3 (3%)       | 90    | < 0.0001<br>( $\chi^2$ test)              |
| Myeloid response state 2 | 34 (69%) | 15 (31%)     | 49    |                                           |
| Myeloid response state 3 | 51 (70%) | 22 (30%)     | 73    | < 0.0001<br>( $\chi^2$ test<br>for trend) |
| Myeloid response state 4 | 36 (67%) | 18 (33%)     | 54    |                                           |
| Myeloid response state 5 | 22 (21%) | 83 (79%)     | 105   |                                           |
| Total                    | 230      | 141          | 371   |                                           |

**Supplemental Table 16. Antibody Sources and Staining Conditions for Immunohistochemical and Immunofluorescence Assays**

| Markers | Antibody Source                | Clone    | Species           | Dilution | Pretreatment                                          | Cellular localization      | Application |
|---------|--------------------------------|----------|-------------------|----------|-------------------------------------------------------|----------------------------|-------------|
| CD11b   | Abcam, UK                      | EPR1344  | Rabbit monoclonal | 1:2000   | Citrate buffer (pH 6.0) steam 10 min                  | Membranous                 | IHC, TSA    |
| CD14    | Sino Biological, China         | 001      | Rabbit monoclonal | 1:2000   | Citrate buffer (pH 6.0) steam 10 min                  | Membranous                 | IHC, TSA    |
| CD15    | ZSBio, China                   | MMA+BY87 | Mouse monoclonal  | 1:200    | Citrate buffer (pH 6.0) steam 10 min                  | Membranous and cytoplasmic | IHC, TSA    |
| CD163   | ZSBio, China                   | 10D6     | Mouse monoclonal  | 1:100    | Citrate buffer (pH 6.0) steam 10 min                  | Membranous                 | IHC, TSA    |
| CD169   | R&D Systems, USA               | NS0      | Sheep polyclonal  | 1:200    | Citrate buffer (pH 6.0) steam 10 min                  | Membranous                 | IHC, TSA    |
| CD204   | Transgenic, Japan              | SRA-C6   | Mouse monoclonal  | 1:100    | Citrate buffer (pH 6.0) steam 10 min                  | Membranous                 | IHC         |
| CD206   | R&D Systems, USA               | 685645   | Mouse monoclonal  | 1:100    | Citrate buffer (pH 6.0) steam 10 min                  | Membranous                 | IHC         |
| CD33    | Leica, Germany                 | PW44     | Mouse monoclonal  | 1:50     | EDTA antigen retrieval solution (pH 9.0) steam 10 min | Membranous                 | IHC         |
| CD68    | Dako, USA                      | PG-M1    | Mouse monoclonal  | 1:200    | Citrate buffer (pH 6.0) steam 10 min                  | Cytoplasmic                | IHC, TSA    |
| CD8     | ZSBio, China                   | EP334    | Rabbit monoclonal | 1:100    | Citrate buffer (pH 6.0) steam 10 min                  | Membranous                 | IHC         |
| PD-L1   | Cell Signaling Technology, USA | E1L3N    | Rabbit monoclonal | 1:100    | Citrate buffer (pH 6.0) steam 10 min                  | Membranous                 | IHC, TSA    |
| S100    | ZSBio, China                   | /        | Rabbit polyclonal | 1:100    | Citrate buffer (pH 6.0) steam 10 min                  | Cytoplasmic                | IHC         |

**Supplemental Table 17. Antibody Information for Flow Cytometry Assays**

| Markers | Antibody Source      | Clone   | Conjugation                |
|---------|----------------------|---------|----------------------------|
| CD11b   | Beckman Coulter, USA | Bear1   | Phycoerythrin/Cy7          |
| CD14    | BD                   | M5E2    | Alexa Fluor 700            |
| CD15    | eBioscience, USA     | MMA     | eFluor 450                 |
| CD169   | Biolegend, USA       | 7-239   | Allophycocyanin            |
| CD3     | eBioscience, USA     | OKT3    | Alexa Fluor 700            |
| CD4     | Biolegend, USA       | OKT4    | Brilliant Violet 421       |
| CD45    | Beckman Coulter, USA | J.33    | Krome Orange               |
| CD8     | Beckman Coulter, USA | B9.11   | Fluorescein isothiocyanate |
| CD86    | Beckman Coulter, USA | HA5.2B7 | Phycoerythrin              |
| DCFDA   | Sigma-Aldrich        |         |                            |
| HLA-DR  | BD                   | G46-6   | Brilliant Violet 421       |
| PD-1    | eBioscience, USA     | J105    | Allophycocyanin            |

## Supplemental References

1. Xu J, et al. An in situ molecular signature to predict early recurrence in hepatitis B virus-related hepatocellular carcinoma. *J Hepatol.* 2012;57(2):313-21.
2. Liu CQ, et al. Expression patterns of programmed death ligand 1 correlate with different microenvironments and patient prognosis in hepatocellular carcinoma. *Br J Cancer.* 2018;119(1):80-8.
3. Li XF, et al. Increased autophagy sustains the survival and pro-tumourigenic effects of neutrophils in human hepatocellular carcinoma. *J Hepatol.* 2015;62(1):131-9.
4. Meng YM, et al. Monocytes/Macrophages promote vascular CXCR4 expression via the ERK pathway in hepatocellular carcinoma. *Oncoimmunology.* 2018;7(3):e1408745.
5. Wu C, et al. Spleen mediates a distinct hematopoietic progenitor response supporting tumor-promoting myelopoiesis. *J Clin Invest.* 2018;128(8):3425-38.
6. Ritchie ME, et al. limma powers differential expression analyses for RNA-sequencing and microarray studies. *Nucleic Acids Res.* 2015;43(7):e47.
7. Leek JT, et al. The sva package for removing batch effects and other unwanted variation in high-throughput experiments. *Bioinformatics.* 2012;28(6):882-3.
8. Yu G, et al. clusterProfiler: an R package for comparing biological themes among gene clusters. *OMICS.* 2012;16(5):284-7.
9. Colaprico A, et al. TCGAAbiolinks: an R/Bioconductor package for integrative analysis of TCGA data. *Nucleic Acids Res.* 2016;44(8):e71.
10. Trapnell C, et al. The dynamics and regulators of cell fate decisions are revealed by pseudotemporal ordering of single cells. *Nat Biotechnol.* 2014;32(4):381-6.
11. Heagerty PJ, Lumley T, and Pepe MS. Time-dependent ROC curves for censored survival data and a diagnostic marker. *Biometrics.* 2000;56(2):337-44.
12. Vickers AJ, and Elkin EB. Decision curve analysis: a novel method for evaluating prediction models. *Medical decision making : an international journal of the Society for Medical Decision Making.* 2006;26(6):565-74.
13. Camp RL, Dolled-Filhart M, and Rimm DL. X-tile: a new bio-informatics tool for biomarker assessment and outcome-based cut-point optimization. *Clin Cancer Res.* 2004;10(21):7252-9.
14. Li B, et al. Comprehensive analyses of tumor immunity: implications for cancer immunotherapy. *Genome Biol.* 2016;17(1):174.
15. Newman AM, et al. Robust enumeration of cell subsets from tissue expression profiles. *Nat Methods.* 2015;12(5):453-7.
16. Becht E, et al. Estimating the population abundance of tissue-infiltrating immune and stromal cell populations using gene expression. *Genome Biol.* 2016;17(1):218.
17. Bindea G, et al. Spatiotemporal dynamics of intratumoral immune cells reveal the immune landscape in human cancer. *Immunity.* 2013;39(4):782-95.
18. Gabilovich DI, and Nagaraj S. Myeloid-derived suppressor cells as regulators of the immune system. *Nat Rev Immunol.* 2009;9(3):162-74.
19. Bronte V, et al. Recommendations for myeloid-derived suppressor cell nomenclature and characterization standards. *Nat Commun.* 2016;7:12150.

20. Okita Y, et al. Role of tumor-infiltrating CD11b+ antigen-presenting cells in the progression of gastric cancer. *J Surg Res.* 2014;186(1):192-200.
21. Cui TX, et al. Myeloid-derived suppressor cells enhance stemness of cancer cells by inducing microRNA101 and suppressing the corepressor CtBP2. *Immunity.* 2013;39(3):611-21.
22. Holness CL, and Simmons DL. Molecular cloning of CD68, a human macrophage marker related to lysosomal glycoproteins. *Blood.* 1993;81(6):1607-13.
23. Ding T, et al. High tumor-infiltrating macrophage density predicts poor prognosis in patients with primary hepatocellular carcinoma after resection. *Human Pathology.* 2009;40(3):381-9.
24. Kuang DM, et al. Activated monocytes in peritumoral stroma of hepatocellular carcinoma promote expansion of memory T helper 17 cells. *Hepatology.* 2010;51(1):154-64.
25. Fan QM, et al. Tumor-associated macrophages promote cancer stem cell-like properties via transforming growth factor-beta1-induced epithelial-mesenchymal transition in hepatocellular carcinoma. *Cancer Lett.* 2014;352(2):160-8.
26. Kong LQ, et al. The clinical significance of the CD163+ and CD68+ macrophages in patients with hepatocellular carcinoma. *PLoS One.* 2013;8(3):e59771.
27. Zhang Y, et al. CD169 identifies an anti-tumour macrophage subpopulation in human hepatocellular carcinoma. *J Pathol.* 2016;239(2):231-41.
28. Li JQ, et al. Distinct patterns and prognostic values of tumor-infiltrating macrophages in hepatocellular carcinoma and gastric cancer. *J Transl Med.* 2017;15(1):37.
29. Jensen TO, et al. Macrophage markers in serum and tumor have prognostic impact in American Joint Committee on Cancer stage I/II melanoma. *J Clin Oncol.* 2009;27(20):3330-7.
30. Yeung OW, et al. Alternatively activated (M2) macrophages promote tumour growth and invasiveness in hepatocellular carcinoma. *J Hepatol.* 2015;62(3):607-16.
31. Wang B, et al. High CD204(+) tumor-infiltrating macrophage density predicts a poor prognosis in patients with urothelial cell carcinoma of the bladder. *Oncotarget.* 2015;6(24):20204-14.
32. Hou YC, et al. Coexpression of CD44-positive/CD133-positive cancer stem cells and CD204-positive tumor-associated macrophages is a predictor of survival in pancreatic ductal adenocarcinoma. *Cancer.* 2014;120(17):2766-77.
33. Shu QH, et al. Prognostic value of polarized macrophages in patients with hepatocellular carcinoma after curative resection. *J Cell Mol Med.* 2016;20(6):1024-35.
34. Dong P, et al. CD86(+)/CD206(+), Diametrically Polarized Tumor-Associated Macrophages, Predict Hepatocellular Carcinoma Patient Prognosis. *Int J Mol Sci.* 2016;17(3):320.
35. Tan-Garcia A, et al. Intrahepatic CD206(+) macrophages contribute to inflammation in advanced viral-related liver disease. *J Hepatol.* 2017;67(3):490-500.
36. Kuang DM, et al. Peritumoral neutrophils link inflammatory response to disease progression by fostering angiogenesis in hepatocellular carcinoma. *J Hepatol.* 2011;54(5):948-55.

37. Li YW, et al. Intratumoral neutrophils: a poor prognostic factor for hepatocellular carcinoma following resection. *J Hepatol.* 2011;54(3):497-505.
38. Zhou SL, et al. Overexpression of CXCL5 mediates neutrophil infiltration and indicates poor prognosis for hepatocellular carcinoma. *Hepatology.* 2012;56(6):2242-54.
39. He M, et al. Peritumoral stromal neutrophils are essential for c-Met-elicited metastasis in human hepatocellular carcinoma. *Oncoimmunology.* 2016;5(10):e1219828.
40. Ouyang FZ, et al. Dendritic cell-elicited B-cell activation fosters immune privilege via IL-10 signals in hepatocellular carcinoma. *Nat Commun.* 2016;7:13453.
